# Supplementary material for: Chirality: a key parameter in chemical probes
Source: Royal Society of Chemistry journal article supplement (doi:10.1039/d3cb00082f), 2023-01-01
Supplement: d3cb00082f1.pdf [file d3cb00082f1.pdf]

## Chirality: a Key Parameter in Chemical Probes

Andrew McGown,<sup>a,b</sup> Jordan Nafie,<sup>c</sup> Mohammed Otayfah,<sup>a</sup> Storm Hassell-Hart,<sup>a</sup> Graham J. Tizzard,<sup>d</sup> Simon J. Coles,<sup>d</sup> Rebecca Banks,<sup>e</sup> Graham P. Marsh,<sup>e</sup> Hannah J. Maple\*,<sup>e</sup> George E. Kostakis\*,<sup>a</sup> Ilaria Proietti Silvestri,<sup>f</sup> Paul Colbon,<sup>f</sup> John Spencer\*,<sup>a,b</sup>

<sup>a</sup> Department of Chemistry, School of Life Sciences, University of Sussex, Falmer, BN1 9QJ, UK.

<sup>b</sup> Sussex Drug Discovery Centre, Department of Chemistry, School of Life Sciences, University of Sussex, Falmer, BN1 9QJ, UK.

<sup>c</sup> Biotools, Inc., 17546 Beeline Highway, Jupiter, Florida 33458, US.

<sup>d</sup> National Crystallography Service, School of Chemistry, University of Southampton, Southampton, SO17 1BJ, UK.

<sup>e</sup> Bio-Techne (Tocris), The Watkins Building, Atlantic Road, Avonmouth, Bristol BS11 9QD, UK.

<sup>f</sup> Liverpool ChiroChem Ltd, The Heath Business & Technical Park, Runcorn, Cheshire WA7 4QX, UK.

### Contents

|                                                |             |
|------------------------------------------------|-------------|
| Xray structures and table of data.....         | Pages S1-S4 |
| Synthesis and Characterisation of Ligands..... | S5-S7       |
| VCD details.....                               | S8-S42      |
| References.....                                | S42         |

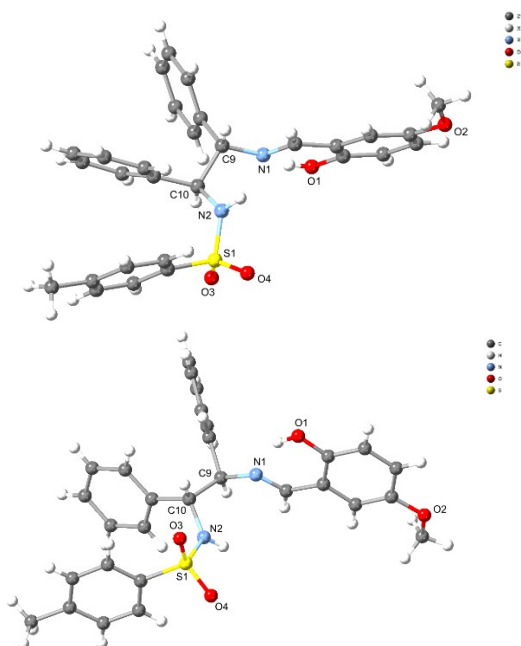

**Figure S1.** A projection of the crystal structure of the chiral SS (upper) and RR (lower) organic ligands.

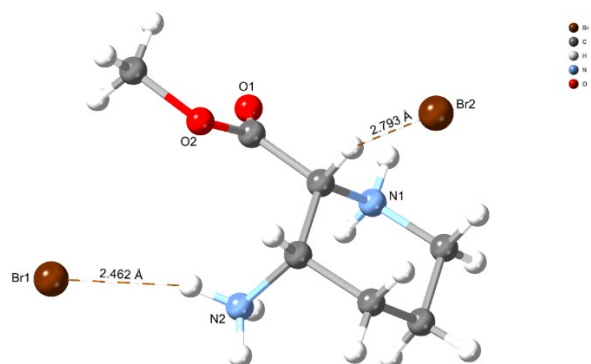

**Figure S2:** A9779 structure

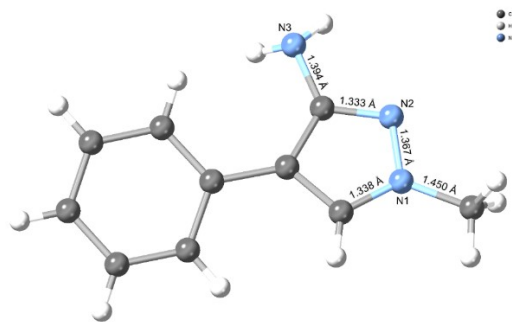

**Figure S3:** 3-aminopyrazole regiomer by x-ray

**Table S1** Crystal data and structure refinement for the 4 compounds

| Identification code                         | SS                                                              | RR                                                              | 3-Aminopyrazole analogue                                      | LCC- A9779                                                                   |
|---------------------------------------------|-----------------------------------------------------------------|-----------------------------------------------------------------|---------------------------------------------------------------|------------------------------------------------------------------------------|
| Empirical formula                           | C <sub>29</sub> H <sub>28</sub> N <sub>2</sub> O <sub>4</sub> S | C <sub>29</sub> H <sub>28</sub> N <sub>2</sub> O <sub>4</sub> S | C <sub>10</sub> H <sub>11</sub> N <sub>3</sub>                | C <sub>7</sub> H <sub>16</sub> Br <sub>2</sub> N <sub>2</sub> O <sub>2</sub> |
| Formula weight                              | 500.59                                                          | 500.59                                                          | 173.219                                                       | 320.04                                                                       |
| Temperature/K                               | 100.0(6)                                                        | 100.01(10)                                                      | 100(2)                                                        | 150.0                                                                        |
| Crystal system                              | orthorhombic                                                    | orthorhombic                                                    | orthorhombic                                                  | orthorhombic                                                                 |
| Space group                                 | P2 <sub>1</sub> 2 <sub>1</sub> 2 <sub>1</sub>                   | P2 <sub>1</sub> 2 <sub>1</sub> 2 <sub>1</sub>                   | P2 <sub>1</sub> 2 <sub>1</sub> 2 <sub>1</sub>                 | P2 <sub>1</sub> 2 <sub>1</sub> 2 <sub>1</sub>                                |
| a/Å                                         | 6.44134(7)                                                      | 6.43966(10)                                                     | 5.9358(2)                                                     | 9.1475(6)                                                                    |
| b/Å                                         | 17.00295(19)                                                    | 16.9994(3)                                                      | 8.3325(3)                                                     | 10.8895(8)                                                                   |
| c/Å                                         | 23.3012(2)                                                      | 23.3008(7)                                                      | 17.6337(6)                                                    | 12.2544(9)                                                                   |
| α/°                                         | 90                                                              | 90                                                              | 90                                                            | 90                                                                           |
| β/°                                         | 90                                                              | 90                                                              | 90                                                            | 90                                                                           |
| γ/°                                         | 90                                                              | 90                                                              | 90                                                            | 90                                                                           |
| Volume/Å <sup>3</sup>                       | 2551.99(5)                                                      | 2550.74(10)                                                     | 872.16(5)                                                     | 1220.68(15)                                                                  |
| Z                                           | 4                                                               | 4                                                               | 4                                                             | 4                                                                            |
| ρ <sub>calc</sub> /cm <sup>3</sup>          | 1.303                                                           | 1.304                                                           | 1.319                                                         | 1.741                                                                        |
| μ/mm <sup>-1</sup>                          | 1.435                                                           | 1.436                                                           | 0.083                                                         | 8.256                                                                        |
| F(000)                                      | 1056.0                                                          | 1056.0                                                          | 368.2                                                         | 632.0                                                                        |
| Crystal size/mm <sup>3</sup>                | 0.12 × 0.1 × 0.05                                               | 0.1 × 0.08 × 0.03                                               | 0.09 × 0.09 × 0.03                                            | 0.22 × 0.18 × 0.08                                                           |
| Radiation                                   | Cu Kα (λ = 1.54184)                                             | Cu Kα (λ = 1.54184)                                             | Mo Kα (λ = 0.71075)                                           | CuKα (λ = 1.54178)                                                           |
| 2θ range for data collection/°              | 7.588 to 142.826                                                | 10.408 to 134.17                                                | 5.4 to 55.2                                                   | 10.868 to 140.058                                                            |
| Index ranges                                | -7 ≤ h ≤ 7, -20 ≤ k ≤ 20, -28 ≤ l ≤ 24                          | -7 ≤ h ≤ 7, -19 ≤ k ≤ 20, -23 ≤ l ≤ 27                          | -7 ≤ h ≤ 7, -10 ≤ k ≤ 10, -22 ≤ l ≤ 22                        | -11 ≤ h ≤ 11, -12 ≤ k ≤ 13, -13 ≤ l ≤ 14                                     |
| Reflections collected                       | 13429                                                           | 14476                                                           | 11078                                                         | 5642                                                                         |
| Independent reflections                     | 4668 [R <sub>int</sub> = 0.0340, R <sub>sigma</sub> = 0.0300]   | 4451 [R <sub>int</sub> = 0.0288, R <sub>sigma</sub> = 0.0210]   | 2018 [R <sub>int</sub> = 0.0364, R <sub>sigma</sub> = 0.0222] | 2220 [R <sub>int</sub> = 0.0439, R <sub>sigma</sub> = 0.0489]                |
| Data/restraints/parameters                  | 4668/767/328                                                    | 4451/0/328                                                      | 2018/0/120                                                    | 2220/0/121                                                                   |
| Goodness-of-fit on F <sup>2</sup>           | 1.134                                                           | 1.055                                                           | 1.065                                                         | 1.140                                                                        |
| Final R indexes [I ≥ 2σ (I)]                | R <sub>1</sub> = 0.0311, wR <sub>2</sub> = 0.0819               | R <sub>1</sub> = 0.0274, wR <sub>2</sub> = 0.0714               | R <sub>1</sub> = 0.0325, wR <sub>2</sub> = 0.0798             | R <sub>1</sub> = 0.0394, wR <sub>2</sub> = 0.1170                            |
| Final R indexes [all data]                  | R <sub>1</sub> = 0.0329, wR <sub>2</sub> = 0.0834               | R <sub>1</sub> = 0.0274, wR <sub>2</sub> = 0.0714               | R <sub>1</sub> = 0.0349, wR <sub>2</sub> = 0.0810             | R <sub>1</sub> = 0.0395, wR <sub>2</sub> = 0.1172                            |
| Largest diff. peak/hole / e Å <sup>-3</sup> | 0.32/-0.30                                                      | 0.26/-0.26                                                      | 0.18/-0.18                                                    | 0.80/-0.82                                                                   |
| Flack parameter                             | -0.004(7)                                                       | -0.007(6)                                                       | 0.0(9)                                                        | -0.01(3)                                                                     |

## Experimental section

### Materials.

All reagents were purchased from Fluorochem, Fischer Scientific or Alfa Aesar and used without further purification. Experiments were performed under aerobic conditions.

### Instrumentation

NMR spectra were recorded with a Varian VNMRs 600 at 25 °C, at either 600 MHz or 151 MHz in Chloroform-*d* or DMSO-*d*<sub>6</sub>. Chemical shifts are quoted in parts per million (ppm). Coupling constants (*J*) are recorded in units of Hz. FT-IR spectra were recorded over the range of 4000–650 cm<sup>-1</sup> on a PerkinElmer Spectrum One FT-IR spectrometer fitted with a UATR polarisation accessory. HRMS data were obtained with a Bruker Daltonics Fourier Transform (FTMS) Apex II spectrometer with electrospray ionization (ESI) and methanol as solvent. HR-MS data were obtained on a VG Autospec Fissions instrument (EI at 70 eV). Molecular ions are reported as mass/charge (*m/z*) ratios.

### Single crystal X-Ray Diffraction

Crystallographic data for **SS** and **RR** were collected ( $\omega$  scans) at the University of Sussex using an Agilent Xcalibur Eos Gemini Ultra diffractometer with CCD plate detector under a flow of nitrogen gas at 100(2) K and Cu K $\alpha$  radiation ( $\lambda = 1.54184 \text{ \AA}$ ). The data were processed with CrysAlisPro and solved by intrinsic phasing methods with SHELXT.<sup>1</sup> All crystal structures were then refined on Fo<sup>2</sup> by full-matrix least-squares refinements using SHELXL.<sup>1</sup> Geometric/crystallographic calculations were performed using PLATON,<sup>2</sup> Olex2,<sup>3</sup> and WINGX<sup>4</sup> packages; graphics were prepared with CrystalMaker.<sup>5</sup>

### Ligand synthesis

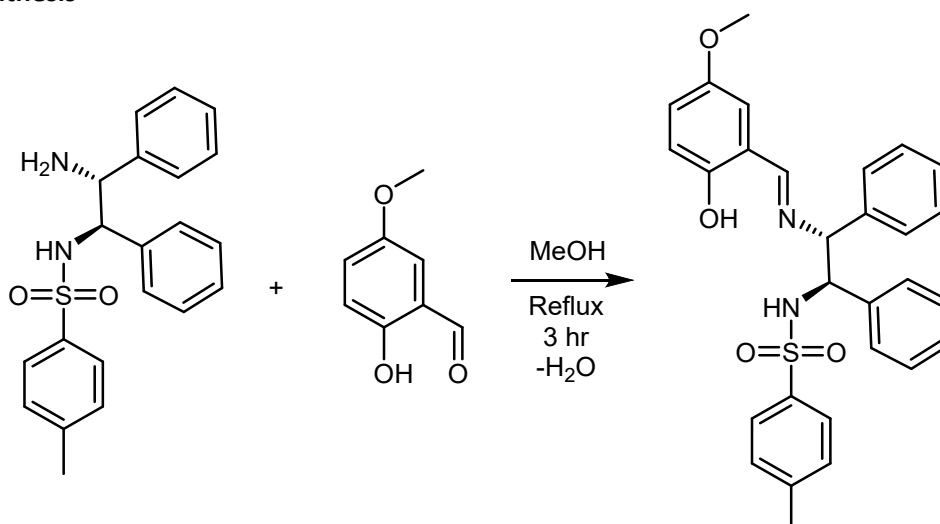

### Scheme S1. Synthesis of N-[(1S,2S)-2-[(E)-[(2-hydroxy-5-methoxyphenyl)methylidene]amino]-1,2-diphenylethyl]-4-methylbenzene-1-sulfonamide. (**SS**)

(1S,2S) (-)-N-(4-Toluenesulfonyl)-1,2-diphenylethylenediamine (0.4465 g, 1.2mmol, 1 eq) and 2-Hydroxy-5-methoxybenzaldehyde (0.15 ml, 1.2mmol, 1 eq) were dissolved in 20ml of methanol and heated (80°C) in a round bottom flask for 3hr. The the reaction was cooled to RT and the excess solvent was removed in vacuo. The crude material was washed with cold EtOH (ca. 100 mL) and dried to afford the **SS** ligand. **ESI-ETMS** in methanol: *m/z* calcd. for [C<sub>29</sub>H<sub>30</sub>N<sub>2</sub>O<sub>4</sub>S] : 502.63 found 502.07 . Yield = 1.4166 g (78%). **<sup>1</sup>H NMR**<sup>1</sup> (600 MHz, Chloroform-*d*)  $\delta$  12.18 (s, 1H), 8.12 (s, 1H), 7.42 – 7.37 (m, 2H), 7.20 (dd, *J* = 5.1, 2.0 Hz, 3H), 7.16 – 7.07 (m, 5H), 7.00 (d, *J* = 8.0 Hz, 2H), 6.97 – 6.86 (m, 4H), 6.62 (d, *J* = 3.0 Hz, 1H), 5.21 (d, *J* = 7.4 Hz, 1H), 4.76 (dd, *J* = 7.4, 5.6 Hz, 1H), 4.57 (d, *J* = 5.6 Hz, 1H), 3.73 (s, 3H), 2.31 (s, 3H). **<sup>13</sup>C NMR** (151 MHz, Chloroform-*d*)  $\delta$  166.9, 154.9, 143.0, 138.2, 129.2, 128.4, 128.0, 127.9, 127.6, 127.5, 126.9, 120.1, 118.0, 117.7, 115.1, 78.4, 63.3, 55.8, 21.4.

### Synthesis of N-[(1R,2R)-2-[(E)-[(2-hydroxy-5-methoxyphenyl)methylidene]amino]-1,2-diphenylethyl]-4-methylbenzene-1-sulfonamide. (**RR**) (1R,2R) (-)-N-(4-Toluenesulfonyl)-1,2-

diphenylethylenediamine (0.4465 g, 1.2mmol, 1 eq) and 2-Hydroxy-5-methoxybenzaldehyde (0.15 ml, 1.2mmol, 1 eq) were dissolved in 20ml of methanol and heated (80°C) in a round bottom flask for 3hr. The reaction was cooled to RT and the excess solvent was removed in vacuo. The crude material was washed with cold EtOH (ca. 100 mL) and dried to afford the RR ligand. **ESI-ETMS** in methanol:  $m/z$  calcd. for  $[C_{29}H_{30}N_2O_4S]$  : 502.63 found 502.07 .  **$^1H$  NMR** ( $^1H$  NMR (500 MHz,  $DMSO-d_6$ )  $\delta$  12.20 (s, 1H), 8.47 (d,  $J = 8.1$  Hz, 1H), 8.42 (s, 1H), 7.30 (d,  $J = 7.9$  Hz, 2H), 7.13 (d,  $J = 4.2$  Hz, 4H), 7.09 (q,  $J = 4.4$  Hz, 1H), 6.96 (dq,  $J = 22.6, 4.7, 4.2$  Hz, 9H), 6.81 (d,  $J = 8.8$  Hz, 1H), 4.77 (t,  $J = 7.9$  Hz, 1H), 4.50 (d,  $J = 8.7$  Hz, 1H), 3.70 (s, 3H), 2.17 (s, 3H).  **$^{13}C$  NMR** (151 MHz,  $cdCl_3$ )  $\delta$  166.9, 154.9, 152.1, 143.0, 137.3, 136.8, 129.3, 128.5, 128.0, 127.9, 127.6, 127.6, 127.5, 126.9, 120.2, 117.8, 115.1, 78.4, 77.2, 77.0, 76.8, 63.3, 55.8, 21.4.

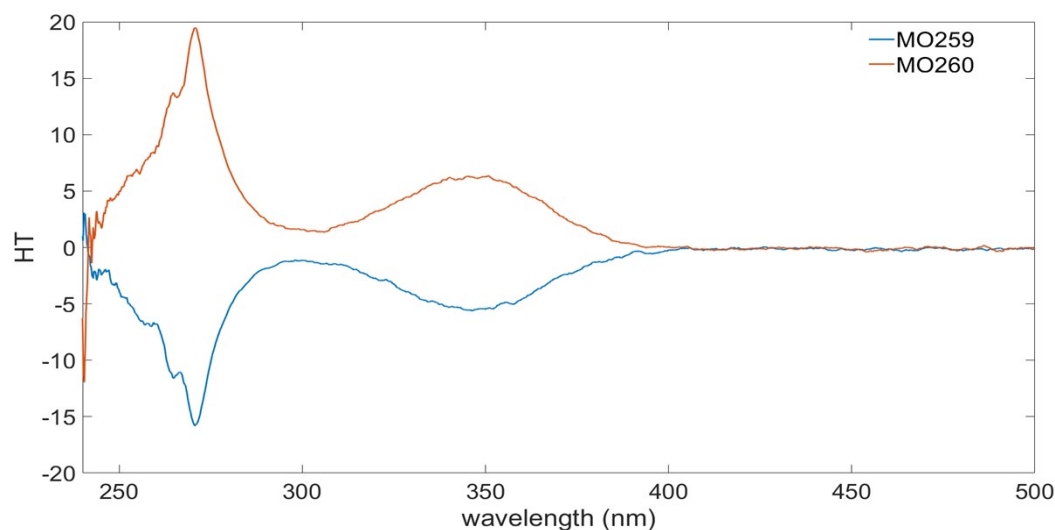

Figure

Figure S4. The CD spectra for **SS** (MO259) and **RR** (MO260) ligands recorded in MeOH 1mM.

Sample Spectrum

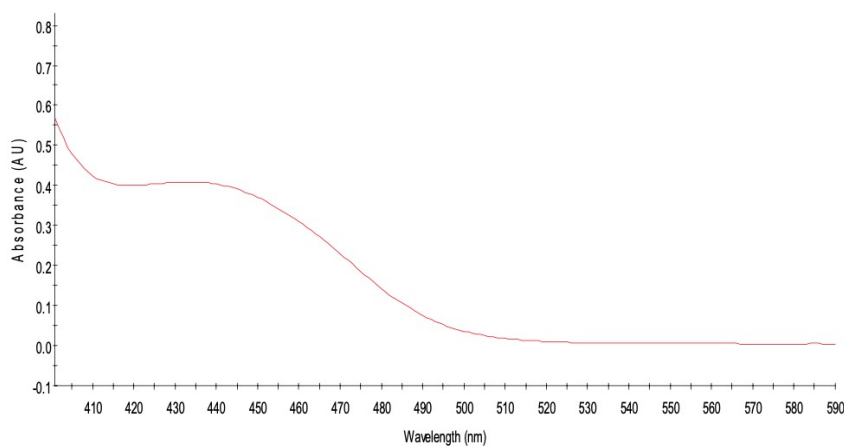

Page 1

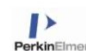

Figure S5. The UV-Vis spectra for **SS** (MO259) and **RR** (MO260) ligands recorded in MeOH 1mM.

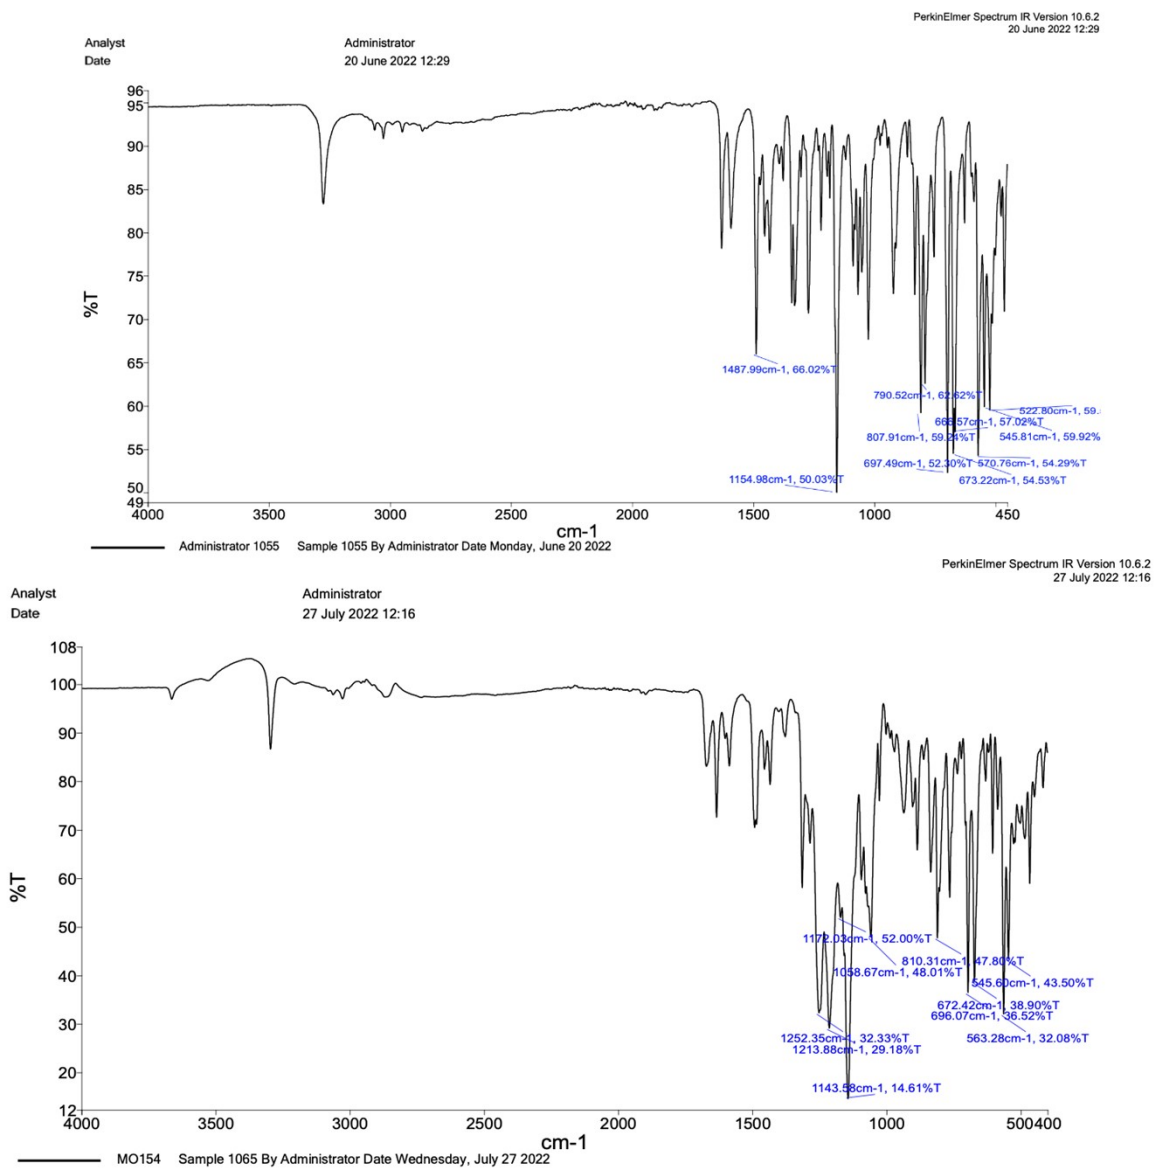

Figure S6. The IR spectra for SS (MO259) and RR (MO260) ligands recorded in solid state

## General methods for absolute configuration determination by VCD.

The absolute configuration (AC) of a molecule can be determined using IR / VCD spectroscopy by comparing the experimental spectra to the *ab initio* DFT calculated IR / VCD spectra of a chosen enantiomer<sup>6-8</sup>. The experimental side is straightforward, the important factors being the solvent and the concentration (for a given cell path). Generally, NMR solvents are used in order to maximize the available spectral window in the infrared fingerprint region, with CDCl<sub>3</sub> being the chosen solvent as long as the chiral compound is soluble. This solvent has a broad spectral window (950 – 2000 cm<sup>-1</sup>) and has minimal solvent-solute interactions, which is favorable for getting DFT calculations to match with the experiment. The concentration is determined experimentally, with the optimal range of absorbances being 0.2 – 0.8 A for the region of interest (typically the fingerprint region). Practically, the concentration is adjusted as high as possible while still keeping the most intense IR peaks below 1.0 A. Once the solution is prepared, the measurement is taken in 1 hour blocks for 6 – 18 hours depending on the inherent VCD intensity of the sample. The VCD blocks are averaged, and baseline corrected with either a solvent, racemate or 'opposite' enantiomer baseline measured for the same amount of time. The IR is solvent subtracted, then both IR and VCD are compared to the DFT calculation.

The DFT calculations are completed as follows. A chosen enantiomer (either one is fine, as enantiomer VCD spectra are interconvertible through multiplication by -1) is constructed and subjected to a thorough conformer search at the molecular mechanics (MM) level. All conformers found (typically in an energy window of 5 to 7 Kcal/mol) are minimized at the DFT level – 6-31G(d) / B3LYP is a good starting point – and then the IR and VCD frequencies are calculated at the same level<sup>9</sup>. Unique conformers are Boltzmann averaged, and the IR / VCD spectra are plotted using a moderate line width to best match the experiment (typically 4 – 8 cm<sup>-1</sup> HWHM). The spectra must be x-axis scaled to best match the experiment, which can be determined either by trial and error or using an algorithm like that found in BioTools (Jupiter, FL) CompareVOA software – the scaling factor tends to range from 0.96 to 0.99 depending on basis set and functional used in the calculation. At this point, the DFT and experimental spectra are compared<sup>10,11</sup> – a match will indicate that the absolute configuration of the sample is the same as the DFT calculation, while a mirror image result indicates the opposite configuration. It is best practice to use both a comparison algorithm and a visual inspection when comparing the data, and it is critical to use both the IR and VCD spectra to ensure no mistakes are made.

### VCD Calculations Supporting Information

There are no imaginary frequencies in any of the conformers.

Compound (**A22153**) :

6-31G(d) / B3LYP (CPCM / Chloroform) : 3 conformers at or above 1% Boltzmann weight.

R enantiomer was calculated

Conformer # 1



Energy: -939.916608 Hartree

| Center<br>Number | Atomic<br>Number | Atomic<br>Type | Coordinates (Angstroms) |           |           |
|------------------|------------------|----------------|-------------------------|-----------|-----------|
|                  |                  |                | X                       | Y         | Z         |
| 1                | 6                | 0              | -2.877155               | 1.344888  | 0.439761  |
| 2                | 6                | 0              | -4.032844               | 0.567304  | 0.309480  |
| 3                | 6                | 0              | -3.930312               | -0.791774 | -0.026800 |
| 4                | 6                | 0              | -2.669413               | -1.376830 | -0.228705 |
| 5                | 6                | 0              | -1.536318               | -0.588225 | -0.092800 |
| 6                | 6                | 0              | -1.627952               | 0.767095  | 0.237008  |
| 7                | 6                | 0              | -0.096861               | -0.999793 | -0.245275 |
| 8                | 6                | 0              | -0.263525               | 1.413650  | 0.314902  |
| 9                | 7                | 0              | 0.623697                | 0.261206  | 0.009697  |
| 10               | 8                | 0              | -4.996366               | -1.629966 | -0.179156 |
| 11               | 6                | 0              | 1.970822                | 0.330940  | 0.146036  |
| 12               | 8                | 0              | 2.587065                | 1.373579  | 0.397192  |
| 13               | 8                | 0              | 2.538614                | -0.877650 | -0.028940 |
| 14               | 6                | 0              | 4.004762                | -1.068186 | 0.015360  |
| 15               | 6                | 0              | 4.675985                | -0.240769 | -1.084557 |
| 16               | 6                | 0              | 4.530736                | -0.729522 | 1.413037  |
| 17               | 6                | 0              | 4.146670                | -2.565304 | -0.269823 |
| 18               | 6                | 0              | -0.101875               | 2.608603  | -0.651472 |
| 19               | 8                | 0              | 0.965464                | 3.471973  | -0.313668 |
| 20               | 6                | 0              | -6.305762               | -1.102934 | 0.011203  |
| 21               | 1                | 0              | 1.723543                | 2.888216  | -0.098869 |
| 22               | 1                | 0              | -2.971375               | 2.395186  | 0.703011  |
| 23               | 1                | 0              | -5.000645               | 1.026841  | 0.470969  |
| 24               | 1                | 0              | -2.612951               | -2.430628 | -0.485227 |
| 25               | 1                | 0              | 0.132540                | -1.387930 | -1.245494 |
| 26               | 1                | 0              | 0.198333                | -1.769720 | 0.477712  |
| 27               | 1                | 0              | -0.041829               | 1.784835  | 1.326015  |
| 28               | 1                | 0              | 4.237709                | -0.477171 | -2.060339 |
| 29               | 1                | 0              | 4.569306                | 0.828706  | -0.897669 |
| 30               | 1                | 0              | 5.742934                | -0.486138 | -1.122869 |
| 31               | 1                | 0              | 4.414844                | 0.332783  | 1.633037  |
| 32               | 1                | 0              | 5.593529                | -0.988005 | 1.474777  |
| 33               | 1                | 0              | 3.994993                | -1.310317 | 2.171807  |
| 34               | 1                | 0              | 3.623371                | -3.155712 | 0.489317  |
| 35               | 1                | 0              | 3.730647                | -2.813796 | -1.251565 |
| 36               | 1                | 0              | 5.204158                | -2.847721 | -0.259875 |
| 37               | 1                | 0              | -0.014727               | 2.214195  | -1.677964 |
| 38               | 1                | 0              | -1.016369               | 3.211340  | -0.609397 |
| 39               | 1                | 0              | -6.989302               | -1.935887 | -0.159990 |

|    |   |   |           |           |           |
|----|---|---|-----------|-----------|-----------|
| 40 | 1 | 0 | -6.441442 | -0.724995 | 1.031967  |
| 41 | 1 | 0 | -6.523124 | -0.300856 | -0.704787 |

-----

Conformer # 2

Energy: -939.916733 Hartree

Center Atomic Atomic Coordinates (Angstroms)

| Number | Number | Type | X         | Y         | Z         |
|--------|--------|------|-----------|-----------|-----------|
| 1      | 6      | 0    | -2.855117 | 1.642499  | 0.464419  |
| 2      | 6      | 0    | -4.044758 | 0.928586  | 0.372450  |
| 3      | 6      | 0    | -4.034023 | -0.447284 | 0.075488  |
| 4      | 6      | 0    | -2.819684 | -1.116073 | -0.127234 |
| 5      | 6      | 0    | -1.637562 | -0.380993 | -0.028686 |
| 6      | 6      | 0    | -1.641324 | 0.980237  | 0.260260  |
| 7      | 6      | 0    | -0.228859 | -0.886258 | -0.188213 |
| 8      | 6      | 0    | -0.240299 | 1.546159  | 0.302562  |
| 9      | 7      | 0    | 0.571481  | 0.333782  | 0.020824  |
| 10     | 8      | 0    | -5.260952 | -1.040271 | 0.009015  |
| 11     | 6      | 0    | 1.922305  | 0.325109  | 0.135694  |
| 12     | 8      | 0    | 2.604380  | 1.334858  | 0.347842  |
| 13     | 8      | 0    | 2.413461  | -0.920127 | -0.012851 |
| 14     | 6      | 0    | 3.866025  | -1.198359 | 0.020046  |
| 15     | 6      | 0    | 4.572164  | -0.444517 | -1.110521 |
| 16     | 6      | 0    | 4.429475  | -0.853135 | 1.401320  |
| 17     | 6      | 0    | 3.913618  | -2.708637 | -0.224200 |
| 18     | 6      | 0    | -0.019993 | 2.701260  | -0.699932 |
| 19     | 8      | 0    | 1.101548  | 3.507807  | -0.399062 |
| 20     | 6      | 0    | -5.324004 | -2.431732 | -0.286882 |
| 21     | 1      | 0    | 1.826158  | 2.885278  | -0.177785 |
| 22     | 1      | 0    | -2.881624 | 2.703697  | 0.697229  |
| 23     | 1      | 0    | -5.002815 | 1.414775  | 0.527455  |
| 24     | 1      | 0    | -2.789420 | -2.175758 | -0.353927 |
| 25     | 1      | 0    | 0.029029  | -1.652925 | 0.552623  |
| 26     | 1      | 0    | -0.039115 | -1.316326 | -1.179840 |
| 27     | 1      | 0    | 0.016644  | 1.932456  | 1.299685  |
| 28     | 1      | 0    | 4.102192  | -0.674177 | -2.073077 |
| 29     | 1      | 0    | 4.541349  | 0.633907  | -0.949091 |
| 30     | 1      | 0    | 5.619243  | -0.762627 | -1.159438 |
| 31     | 1      | 0    | 4.379029  | 0.220007  | 1.591445  |
| 32     | 1      | 0    | 5.475907  | -1.172401 | 1.458296  |
| 33     | 1      | 0    | 3.870386  | -1.379424 | 2.182692  |

|    |   |   |           |           |           |
|----|---|---|-----------|-----------|-----------|
| 34 | 1 | 0 | 3.365387  | -3.245088 | 0.557045  |
| 35 | 1 | 0 | 3.471318  | -2.958577 | -1.194061 |
| 36 | 1 | 0 | 4.952246  | -3.054001 | -0.217985 |
| 37 | 1 | 0 | 0.030245  | 2.273367  | -1.715405 |
| 38 | 1 | 0 | -0.895977 | 3.359287  | -0.665157 |
| 39 | 1 | 0 | -6.384494 | -2.687929 | -0.290502 |
| 40 | 1 | 0 | -4.893024 | -2.651889 | -1.271372 |
| 41 | 1 | 0 | -4.808310 | -3.027427 | 0.476433  |

-----

Conformer # 3

Energy: -939.911694 Hartree

| Center | Atomic | Atomic | Coordinates (Angstroms) |           |           |
|--------|--------|--------|-------------------------|-----------|-----------|
| Number | Number | Type   | X                       | Y         | Z         |
| 1      | 6      | 0      | 2.800720                | 1.537984  | -0.806750 |
| 2      | 6      | 0      | 3.970832                | 0.799161  | -0.663555 |
| 3      | 6      | 0      | 3.929294                | -0.521144 | -0.178009 |
| 4      | 6      | 0      | 2.704700                | -1.109687 | 0.166768  |
| 5      | 6      | 0      | 1.542530                | -0.352978 | 0.014368  |
| 6      | 6      | 0      | 1.576879                | 0.954422  | -0.466591 |
| 7      | 6      | 0      | 0.123404                | -0.771508 | 0.307671  |
| 8      | 6      | 0      | 0.189978                | 1.556957  | -0.507429 |
| 9      | 7      | 0      | -0.643815               | 0.398036  | -0.141127 |
| 10     | 8      | 0      | 5.138042                | -1.146234 | -0.081806 |
| 11     | 6      | 0      | -1.991894               | 0.425911  | -0.312243 |
| 12     | 8      | 0      | -2.600440               | 1.396638  | -0.756232 |
| 13     | 8      | 0      | -2.542788               | -0.751572 | 0.071313  |
| 14     | 6      | 0      | -3.997381               | -0.979910 | 0.004052  |
| 15     | 6      | 0      | -4.725633               | 0.005996  | 0.923206  |
| 16     | 6      | 0      | -4.478390               | -0.892239 | -1.447850 |
| 17     | 6      | 0      | -4.132214               | -2.410754 | 0.532001  |
| 18     | 6      | 0      | 0.019216                | 2.739058  | 0.467698  |
| 19     | 8      | 0      | 0.346584                | 2.405838  | 1.809175  |
| 20     | 6      | 0      | 5.170212                | -2.486035 | 0.400020  |
| 21     | 1      | 0      | 1.287728                | 2.166103  | 1.824467  |
| 22     | 1      | 0      | 2.849529                | 2.555617  | -1.185701 |
| 23     | 1      | 0      | 4.935836                | 1.222072  | -0.924713 |
| 24     | 1      | 0      | 2.652479                | -2.126315 | 0.539719  |
| 25     | 1      | 0      | -0.040838               | -0.974410 | 1.374792  |
| 26     | 1      | 0      | -0.175726               | -1.669561 | -0.244961 |
| 27     | 1      | 0      | -0.088052               | 1.910439  | -1.509519 |

|    |   |   |           |           |           |
|----|---|---|-----------|-----------|-----------|
| 28 | 1 | 0 | -4.326537 | -0.058054 | 1.941515  |
| 29 | 1 | 0 | -4.618082 | 1.031004  | 0.565305  |
| 30 | 1 | 0 | -5.791351 | -0.245613 | 0.958942  |
| 31 | 1 | 0 | -4.369260 | 0.120810  | -1.837526 |
| 32 | 1 | 0 | -5.534243 | -1.179960 | -1.501846 |
| 33 | 1 | 0 | -3.906093 | -1.579973 | -2.080307 |
| 34 | 1 | 0 | -3.574473 | -3.110347 | -0.099275 |
| 35 | 1 | 0 | -3.748176 | -2.483894 | 1.554792  |
| 36 | 1 | 0 | -5.185057 | -2.710863 | 0.535178  |
| 37 | 1 | 0 | 0.622417  | 3.584427  | 0.099995  |
| 38 | 1 | 0 | -1.028579 | 3.046427  | 0.472157  |
| 39 | 1 | 0 | 6.220879  | -2.779808 | 0.393325  |
| 40 | 1 | 0 | 4.779908  | -2.553420 | 1.422964  |
| 41 | 1 | 0 | 4.599703  | -3.159694 | -0.251146 |

-----

CompareVOA results (6-31G(d) / B3LYP):

Optimal Scaling Factor = 0.970

$S_{fg}$  (IR) = 91.5

$S_{fg}$  (VCD S-config) = 84.7

$S_{fg}$  (VCD R-config) = 7.6

ESI (Enantiomeric Similarity Index) = 77.1

Confidence Level = 100

Compound (**GEK**) :

6-311G(3df,2pd) / B3PW91 (CPCM / Chloroform) : 12 conformers at 1% or greater Boltzmann weight.

R,R enantiomer was calculated

Conformer # 1

Energy: -1930.410844 Hartree

Center Atomic Atomic Coordinates (Angstroms)

| Number | Number | Type | X        | Y        | Z         |
|--------|--------|------|----------|----------|-----------|
| 1      | 6      | 0    | 2.810541 | 2.788881 | 0.090369  |
| 2      | 6      | 0    | 2.848133 | 3.592263 | 1.220657  |
| 3      | 6      | 0    | 1.716924 | 4.279089 | 1.656075  |
| 4      | 6      | 0    | 0.534936 | 4.141601 | 0.924011  |
| 5      | 6      | 0    | 0.480355 | 3.346460 | -0.206473 |
| 6      | 6      | 0    | 1.624254 | 2.670698 | -0.621155 |

|    |    |   |           |           |           |
|----|----|---|-----------|-----------|-----------|
| 7  | 6  | 0 | 1.767654  | 5.164849  | 2.864704  |
| 8  | 16 | 0 | 1.551111  | 1.626851  | -2.046283 |
| 9  | 8  | 0 | 2.899045  | 1.309119  | -2.416962 |
| 10 | 8  | 0 | 0.653637  | 2.220503  | -2.997821 |
| 11 | 7  | 0 | 0.807577  | 0.231434  | -1.587634 |
| 12 | 6  | 0 | 1.321515  | -0.571622 | -0.472388 |
| 13 | 6  | 0 | 0.168691  | -1.506557 | -0.010718 |
| 14 | 7  | 0 | -1.022266 | -0.715728 | 0.248335  |
| 15 | 6  | 0 | -2.136035 | -1.095261 | -0.259460 |
| 16 | 6  | 0 | -4.557921 | -0.869273 | -0.622774 |
| 17 | 6  | 0 | -3.377494 | -0.391582 | -0.026172 |
| 18 | 6  | 0 | -3.416281 | 0.755958  | 0.787850  |
| 19 | 6  | 0 | -4.639617 | 1.400044  | 0.986328  |
| 20 | 6  | 0 | -5.787168 | 0.920041  | 0.394658  |
| 21 | 6  | 0 | -5.760403 | -0.221132 | -0.418037 |
| 22 | 8  | 0 | -2.317419 | 1.247240  | 1.372619  |
| 23 | 8  | 0 | -6.951523 | -0.600450 | -0.946986 |
| 24 | 6  | 0 | -6.970057 | -1.743364 | -1.776850 |
| 25 | 1  | 0 | -0.189995 | 0.401729  | -1.512550 |
| 26 | 1  | 0 | -1.565476 | 0.648430  | 1.115430  |
| 27 | 6  | 0 | 0.556549  | -2.284842 | 1.229085  |
| 28 | 6  | 0 | 0.709357  | -1.648342 | 2.459740  |
| 29 | 6  | 0 | 1.064493  | -2.373620 | 3.587594  |
| 30 | 6  | 0 | 1.272132  | -3.744713 | 3.500815  |
| 31 | 6  | 0 | 1.117543  | -4.385898 | 2.280198  |
| 32 | 6  | 0 | 0.759030  | -3.659088 | 1.152217  |
| 33 | 6  | 0 | 4.764238  | -2.941349 | -1.496065 |
| 34 | 6  | 0 | 4.736971  | -2.221288 | -0.310415 |
| 35 | 6  | 0 | 3.630878  | -1.442896 | 0.005421  |
| 36 | 6  | 0 | 2.541565  | -1.376112 | -0.856590 |
| 37 | 6  | 0 | 2.577122  | -2.099845 | -2.045921 |
| 38 | 6  | 0 | 3.680806  | -2.876837 | -2.363994 |
| 39 | 1  | 0 | 3.694563  | 2.265879  | -0.247669 |
| 40 | 1  | 0 | 3.775414  | 3.685593  | 1.773424  |
| 41 | 1  | 0 | -0.356790 | 4.666078  | 1.246064  |
| 42 | 1  | 0 | -0.439162 | 3.259649  | -0.769847 |
| 43 | 1  | 0 | 2.603187  | 4.905803  | 3.514048  |
| 44 | 1  | 0 | 0.845406  | 5.099155  | 3.442628  |
| 45 | 1  | 0 | 1.890402  | 6.210372  | 2.570001  |
| 46 | 1  | 0 | 1.572496  | 0.073067  | 0.377218  |
| 47 | 1  | 0 | -0.019723 | -2.220433 | -0.822266 |
| 48 | 1  | 0 | -4.496737 | -1.753603 | -1.242897 |
| 49 | 1  | 0 | -4.668495 | 2.282212  | 1.612841  |
| 50 | 1  | 0 | -6.734504 | 1.421154  | 0.549561  |

|    |   |   |           |           |           |
|----|---|---|-----------|-----------|-----------|
| 51 | 1 | 0 | -8.001678 | -1.871986 | -2.094280 |
| 52 | 1 | 0 | -6.646352 | -2.636451 | -1.234605 |
| 53 | 1 | 0 | -6.336556 | -1.607455 | -2.658057 |
| 54 | 1 | 0 | 0.541327  | -0.581540 | 2.541392  |
| 55 | 1 | 0 | 1.177993  | -1.866462 | 4.537960  |
| 56 | 1 | 0 | 1.549375  | -4.310053 | 4.381975  |
| 57 | 1 | 0 | 1.274014  | -5.454886 | 2.202993  |
| 58 | 1 | 0 | 0.638611  | -4.165629 | 0.201743  |
| 59 | 1 | 0 | 5.627230  | -3.545861 | -1.746831 |
| 60 | 1 | 0 | 5.579030  | -2.260258 | 0.369761  |
| 61 | 1 | 0 | 3.615518  | -0.880162 | 0.931476  |
| 62 | 1 | 0 | 1.743809  | -2.037441 | -2.734970 |
| 63 | 1 | 0 | 3.697790  | -3.430279 | -3.295052 |
| 64 | 1 | 0 | -2.187857 | -1.985035 | -0.896925 |

-----

Conformer # 2

Energy: -1930.410519 Hartree

| Center<br>Number | Atomic<br>Number | Atomic<br>Type | Coordinates (Angstroms) |           |           |
|------------------|------------------|----------------|-------------------------|-----------|-----------|
|                  |                  |                | X                       | Y         | Z         |
| 1                | 6                | 0              | 4.370130                | -0.627010 | 0.357964  |
| 2                | 6                | 0              | 5.019937                | -1.846888 | 0.470223  |
| 3                | 6                | 0              | 4.975497                | -2.786452 | -0.557912 |
| 4                | 6                | 0              | 4.265846                | -2.465612 | -1.717273 |
| 5                | 6                | 0              | 3.612604                | -1.252581 | -1.846014 |
| 6                | 6                | 0              | 3.663595                | -0.336422 | -0.800710 |
| 7                | 6                | 0              | 5.659418                | -4.114005 | -0.422696 |
| 8                | 16               | 0              | 2.810326                | 1.204592  | -0.950192 |
| 9                | 8                | 0              | 2.794203                | 1.552577  | -2.342918 |
| 10               | 8                | 0              | 3.361877                | 2.096675  | 0.030850  |
| 11               | 7                | 0              | 1.248007                | 0.974011  | -0.547499 |
| 12               | 6                | 0              | 0.780492                | 0.842744  | 0.819379  |
| 13               | 6                | 0              | -0.634512               | 1.492246  | 0.941989  |
| 14               | 7                | 0              | -1.545676               | 0.843575  | 0.027297  |
| 15               | 6                | 0              | -2.562726               | 0.228399  | 0.501536  |
| 16               | 6                | 0              | -4.616168               | -1.107745 | 0.263031  |
| 17               | 6                | 0              | -3.528102               | -0.449857 | -0.336514 |
| 18               | 6                | 0              | -3.391395               | -0.453195 | -1.736760 |
| 19               | 6                | 0              | -4.347289               | -1.117708 | -2.507751 |
| 20               | 6                | 0              | -5.407605               | -1.758674 | -1.905271 |
| 21               | 6                | 0              | -5.555262               | -1.760827 | -0.512064 |

|    |   |   |           |           |           |
|----|---|---|-----------|-----------|-----------|
| 22 | 8 | 0 | -2.371653 | 0.164449  | -2.345610 |
| 23 | 8 | 0 | -6.639431 | -2.422520 | -0.031883 |
| 24 | 6 | 0 | -6.829850 | -2.447723 | 1.367202  |
| 25 | 1 | 0 | 0.692147  | 0.561980  | -1.282334 |
| 26 | 1 | 0 | -1.823626 | 0.572503  | -1.621060 |
| 27 | 6 | 0 | -0.571825 | 2.990348  | 0.719933  |
| 28 | 6 | 0 | -0.177589 | 3.805747  | 1.779421  |
| 29 | 6 | 0 | -0.081775 | 5.180408  | 1.621023  |
| 30 | 6 | 0 | -0.383354 | 5.761880  | 0.396352  |
| 31 | 6 | 0 | -0.782447 | 4.958278  | -0.662089 |
| 32 | 6 | 0 | -0.876459 | 3.581640  | -0.502239 |
| 33 | 6 | 0 | 0.726353  | -3.123136 | 2.513913  |
| 34 | 6 | 0 | 0.526797  | -2.957970 | 1.150252  |
| 35 | 6 | 0 | 0.554987  | -1.688764 | 0.586552  |
| 36 | 6 | 0 | 0.783588  | -0.567102 | 1.378022  |
| 37 | 6 | 0 | 0.984622  | -0.743967 | 2.745797  |
| 38 | 6 | 0 | 0.957204  | -2.010390 | 3.311970  |
| 39 | 1 | 0 | 4.421124  | 0.102174  | 1.154722  |
| 40 | 1 | 0 | 5.578097  | -2.068678 | 1.372126  |
| 41 | 1 | 0 | 4.232867  | -3.174718 | -2.536234 |
| 42 | 1 | 0 | 3.079496  | -1.008970 | -2.755443 |
| 43 | 1 | 0 | 6.121751  | -4.419479 | -1.361887 |
| 44 | 1 | 0 | 4.940449  | -4.890757 | -0.149233 |
| 45 | 1 | 0 | 6.427661  | -4.090093 | 0.349354  |
| 46 | 1 | 0 | 1.446166  | 1.455017  | 1.428258  |
| 47 | 1 | 0 | -0.948965 | 1.318837  | 1.978960  |
| 48 | 1 | 0 | -4.695754 | -1.087870 | 1.341689  |
| 49 | 1 | 0 | -4.240085 | -1.118566 | -3.584824 |
| 50 | 1 | 0 | -6.149062 | -2.273267 | -2.503613 |
| 51 | 1 | 0 | -7.740796 | -3.015140 | 1.540046  |
| 52 | 1 | 0 | -6.951934 | -1.439061 | 1.772394  |
| 53 | 1 | 0 | -5.996560 | -2.941486 | 1.875454  |
| 54 | 1 | 0 | 0.052038  | 3.361607  | 2.742062  |
| 55 | 1 | 0 | 0.223511  | 5.798011  | 2.456894  |
| 56 | 1 | 0 | -0.312453 | 6.835163  | 0.270111  |
| 57 | 1 | 0 | -1.023799 | 5.402643  | -1.620060 |
| 58 | 1 | 0 | -1.199180 | 2.967004  | -1.331270 |
| 59 | 1 | 0 | 0.707877  | -4.113671 | 2.951318  |
| 60 | 1 | 0 | 0.349491  | -3.819939 | 0.518834  |
| 61 | 1 | 0 | 0.406520  | -1.583213 | -0.480633 |
| 62 | 1 | 0 | 1.174523  | 0.119503  | 3.374217  |
| 63 | 1 | 0 | 1.123470  | -2.128140 | 4.375825  |
| 64 | 1 | 0 | -2.744749 | 0.198616  | 1.581697  |

-----  
Conformer # 3

Energy: -1930.410028 Hartree

Center Atomic Atomic Coordinates (Angstroms)

| Number | Number | Type | X         | Y         | Z         |
|--------|--------|------|-----------|-----------|-----------|
| 1      | 6      | 0    | 2.638436  | 2.927202  | 0.232770  |
| 2      | 6      | 0    | 2.588272  | 3.681269  | 1.396207  |
| 3      | 6      | 0    | 1.397536  | 4.258411  | 1.831403  |
| 4      | 6      | 0    | 0.246596  | 4.063217  | 1.063482  |
| 5      | 6      | 0    | 0.279347  | 3.316504  | -0.100247 |
| 6      | 6      | 0    | 1.481178  | 2.748045  | -0.512556 |
| 7      | 6      | 0    | 1.350610  | 5.088837  | 3.078910  |
| 8      | 16     | 0    | 1.522307  | 1.763182  | -1.979726 |
| 9      | 8      | 0    | 2.899024  | 1.561676  | -2.325104 |
| 10     | 8      | 0    | 0.606358  | 2.327636  | -2.931403 |
| 11     | 7      | 0    | 0.875492  | 0.298047  | -1.597547 |
| 12     | 6      | 0    | 1.420027  | -0.506775 | -0.498122 |
| 13     | 6      | 0    | 0.327961  | -1.538059 | -0.097535 |
| 14     | 7      | 0    | -0.924355 | -0.844736 | 0.153294  |
| 15     | 6      | 0    | -1.994389 | -1.289487 | -0.390988 |
| 16     | 6      | 0    | -4.413692 | -1.222106 | -0.797386 |
| 17     | 6      | 0    | -3.290527 | -0.684700 | -0.164707 |
| 18     | 6      | 0    | -3.436578 | 0.433423  | 0.686700  |
| 19     | 6      | 0    | -4.705109 | 0.970133  | 0.872270  |
| 20     | 6      | 0    | -5.811001 | 0.425955  | 0.237219  |
| 21     | 6      | 0    | -5.673813 | -0.678413 | -0.606839 |
| 22     | 8      | 0    | -2.388172 | 0.985358  | 1.313088  |
| 23     | 8      | 0    | -6.698127 | -1.275116 | -1.270007 |
| 24     | 6      | 0    | -7.998073 | -0.749086 | -1.098064 |
| 25     | 1      | 0    | -0.134041 | 0.388146  | -1.547858 |
| 26     | 1      | 0    | -1.589456 | 0.453849  | 1.055763  |
| 27     | 6      | 0    | 0.737403  | -2.325344 | 1.129730  |
| 28     | 6      | 0    | 0.805342  | -1.719528 | 2.383208  |
| 29     | 6      | 0    | 1.174870  | -2.453871 | 3.500434  |
| 30     | 6      | 0    | 1.482343  | -3.803493 | 3.379985  |
| 31     | 6      | 0    | 1.414622  | -4.413974 | 2.135881  |
| 32     | 6      | 0    | 1.041286  | -3.678400 | 1.018454  |
| 33     | 6      | 0    | 5.048456  | -2.582107 | -1.519766 |
| 34     | 6      | 0    | 4.940745  | -1.915224 | -0.307748 |
| 35     | 6      | 0    | 3.774110  | -1.231096 | 0.008646  |



|    |   |   |           |           |           |
|----|---|---|-----------|-----------|-----------|
| 36 | 6 | 0 | 2.703747  | -1.207036 | -0.878997 |
| 37 | 6 | 0 | 2.820454  | -1.875991 | -2.094974 |
| 38 | 6 | 0 | 3.984532  | -2.559022 | -2.413440 |
| 39 | 1 | 0 | 3.568476  | 2.490296  | -0.104072 |
| 40 | 1 | 0 | 3.493137  | 3.822157  | 1.975404  |
| 41 | 1 | 0 | -0.690188 | 4.503489  | 1.383785  |
| 42 | 1 | 0 | -0.617652 | 3.183897  | -0.690403 |
| 43 | 1 | 0 | 1.339059  | 6.153688  | 2.832436  |
| 44 | 1 | 0 | 2.217506  | 4.905455  | 3.712476  |
| 45 | 1 | 0 | 0.449034  | 4.883195  | 3.657115  |
| 46 | 1 | 0 | 1.604467  | 0.123134  | 0.379278  |
| 47 | 1 | 0 | 0.213095  | -2.238281 | -0.934212 |
| 48 | 1 | 0 | -4.304004 | -2.079830 | -1.450437 |
| 49 | 1 | 0 | -4.817546 | 1.826182  | 1.525205  |
| 50 | 1 | 0 | -6.780797 | 0.872386  | 0.407200  |
| 51 | 1 | 0 | -8.655207 | -1.360683 | -1.711140 |
| 52 | 1 | 0 | -8.058417 | 0.289915  | -1.433963 |
| 53 | 1 | 0 | -8.321071 | -0.810245 | -0.054994 |
| 54 | 1 | 0 | 0.558905  | -0.670424 | 2.490792  |
| 55 | 1 | 0 | 1.220796  | -1.970951 | 4.468915  |
| 56 | 1 | 0 | 1.770279  | -4.376208 | 4.252912  |
| 57 | 1 | 0 | 1.650547  | -5.465976 | 2.031979  |
| 58 | 1 | 0 | 0.988577  | -4.160742 | 0.049440  |
| 59 | 1 | 0 | 5.958741  | -3.112592 | -1.770823 |
| 60 | 1 | 0 | 5.766935  | -1.921821 | 0.392668  |
| 61 | 1 | 0 | 3.696488  | -0.708802 | 0.955076  |
| 62 | 1 | 0 | 2.001800  | -1.844271 | -2.803391 |
| 63 | 1 | 0 | 4.064048  | -3.070511 | -3.365020 |
| 64 | 1 | 0 | -1.969177 | -2.160680 | -1.054926 |

-----

Conformer # 4

Energy: -1930.409805 Hartree

| Center<br>Number | Atomic<br>Number | Atomic<br>Type | Coordinates (Angstroms) |           |           |
|------------------|------------------|----------------|-------------------------|-----------|-----------|
|                  |                  |                | X                       | Y         | Z         |
| 1                | 6                | 0              | 4.398861                | -0.737864 | 0.243643  |
| 2                | 6                | 0              | 5.027923                | -1.966717 | 0.382514  |
| 3                | 6                | 0              | 4.915374                | -2.950762 | -0.596710 |
| 4                | 6                | 0              | 4.153929                | -2.668854 | -1.733965 |
| 5                | 6                | 0              | 3.520874                | -1.448987 | -1.888557 |
| 6                | 6                | 0              | 3.643889                | -0.485100 | -0.892399 |

|    |    |   |           |           |           |
|----|----|---|-----------|-----------|-----------|
| 7  | 6  | 0 | 5.596856  | -4.278081 | -0.446959 |
| 8  | 16 | 0 | 2.815597  | 1.066028  | -1.075231 |
| 9  | 8  | 0 | 2.732289  | 1.344638  | -2.481124 |
| 10 | 8  | 0 | 3.437044  | 1.992635  | -0.171150 |
| 11 | 7  | 0 | 1.272470  | 0.891558  | -0.581226 |
| 12 | 6  | 0 | 0.873329  | 0.833965  | 0.811635  |
| 13 | 6  | 0 | -0.499529 | 1.559587  | 0.984350  |
| 14 | 7  | 0 | -1.487139 | 0.931686  | 0.136656  |
| 15 | 6  | 0 | -2.498706 | 0.369155  | 0.679635  |
| 16 | 6  | 0 | -4.606906 | -0.886400 | 0.572122  |
| 17 | 6  | 0 | -3.536268 | -0.285085 | -0.092192 |
| 18 | 6  | 0 | -3.483111 | -0.319305 | -1.503253 |
| 19 | 6  | 0 | -4.505218 | -0.956030 | -2.196630 |
| 20 | 6  | 0 | -5.561670 | -1.550319 | -1.522929 |
| 21 | 6  | 0 | -5.621261 | -1.520238 | -0.128048 |
| 22 | 8  | 0 | -2.474772 | 0.247689  | -2.180432 |
| 23 | 8  | 0 | -6.615328 | -2.074789 | 0.614127  |
| 24 | 6  | 0 | -7.663526 | -2.734313 | -0.065525 |
| 25 | 1  | 0 | 0.668172  | 0.464921  | -1.267982 |
| 26 | 1  | 0 | -1.871677 | 0.645036  | -1.497063 |
| 27 | 6  | 0 | -0.374712 | 3.044413  | 0.709353  |
| 28 | 6  | 0 | 0.076376  | 3.876791  | 1.732269  |
| 29 | 6  | 0 | 0.232214  | 5.239319  | 1.523730  |
| 30 | 6  | 0 | -0.065654 | 5.791464  | 0.284760  |
| 31 | 6  | 0 | -0.520698 | 4.971017  | -0.737738 |
| 32 | 6  | 0 | -0.674176 | 3.606574  | -0.527984 |
| 33 | 6  | 0 | 0.706954  | -3.063422 | 2.651228  |
| 34 | 6  | 0 | 0.464827  | -2.937257 | 1.290451  |
| 35 | 6  | 0 | 0.527403  | -1.690868 | 0.680402  |
| 36 | 6  | 0 | 0.835270  | -0.553921 | 1.421258  |
| 37 | 6  | 0 | 1.078724  | -0.691716 | 2.786738  |
| 38 | 6  | 0 | 1.015786  | -1.934924 | 3.399340  |
| 39 | 1  | 0 | 4.502841  | 0.025020  | 1.002867  |
| 40 | 1  | 0 | 5.621645  | -2.160549 | 1.267923  |
| 41 | 1  | 0 | 4.061902  | -3.416181 | -2.513604 |
| 42 | 1  | 0 | 2.945534  | -1.236797 | -2.779952 |
| 43 | 1  | 0 | 6.148372  | -4.340085 | 0.490096  |
| 44 | 1  | 0 | 6.297898  | -4.452206 | -1.265945 |
| 45 | 1  | 0 | 4.871358  | -5.093965 | -0.468965 |
| 46 | 1  | 0 | 1.599641  | 1.432283  | 1.362431  |
| 47 | 1  | 0 | -0.768794 | 1.433563  | 2.040531  |
| 48 | 1  | 0 | -4.651128 | -0.861096 | 1.654521  |
| 49 | 1  | 0 | -4.464284 | -0.980845 | -3.278085 |
| 50 | 1  | 0 | -6.337783 | -2.036391 | -2.097341 |

|    |   |   |           |           |           |
|----|---|---|-----------|-----------|-----------|
| 51 | 1 | 0 | -8.339055 | -3.100923 | 0.703273  |
| 52 | 1 | 0 | -7.292347 | -3.580711 | -0.650376 |
| 53 | 1 | 0 | -8.207340 | -2.051628 | -0.724579 |
| 54 | 1 | 0 | 0.303491  | 3.455667  | 2.705790  |
| 55 | 1 | 0 | 0.581330  | 5.870490  | 2.331837  |
| 56 | 1 | 0 | 0.051745  | 6.855314  | 0.119396  |
| 57 | 1 | 0 | -0.758962 | 5.392680  | -1.706675 |
| 58 | 1 | 0 | -1.038071 | 2.979707  | -1.330259 |
| 59 | 1 | 0 | 0.661017  | -4.036091 | 3.125150  |
| 60 | 1 | 0 | 0.226343  | -3.811733 | 0.697554  |
| 61 | 1 | 0 | 0.343303  | -1.616465 | -0.383862 |
| 62 | 1 | 0 | 1.329496  | 0.183699  | 3.376048  |
| 63 | 1 | 0 | 1.215535  | -2.022806 | 4.460310  |
| 64 | 1 | 0 | -2.623845 | 0.366829  | 1.768068  |

-----

Conformer # 5

Energy: -1930.409634 Hartree

| Center<br>Number | Atomic<br>Number | Atomic<br>Type | Coordinates (Angstroms) |           |           |
|------------------|------------------|----------------|-------------------------|-----------|-----------|
|                  |                  |                | X                       | Y         | Z         |
| 1                | 6                | 0              | 3.414763                | -2.759596 | 0.823607  |
| 2                | 6                | 0              | 4.795021                | -2.834399 | 0.881567  |
| 3                | 6                | 0              | 5.589368                | -2.388641 | -0.177289 |
| 4                | 6                | 0              | 4.955958                | -1.869962 | -1.304788 |
| 5                | 6                | 0              | 3.573642                | -1.784518 | -1.377707 |
| 6                | 6                | 0              | 2.806962                | -2.228043 | -0.309402 |
| 7                | 6                | 0              | 7.084823                | -2.454759 | -0.092376 |
| 8                | 16               | 0              | 1.043184                | -2.129967 | -0.388696 |
| 9                | 8                | 0              | 0.519824                | -3.267905 | 0.313537  |
| 10               | 8                | 0              | 0.689489                | -1.875364 | -1.756507 |
| 11               | 7                | 0              | 0.547992                | -0.836436 | 0.475291  |
| 12               | 6                | 0              | 0.700253                | 0.542007  | 0.020303  |
| 13               | 6                | 0              | -0.590219               | 1.327672  | 0.393371  |
| 14               | 7                | 0              | -1.733764               | 0.679437  | -0.210066 |
| 15               | 6                | 0              | -2.675084               | 0.249536  | 0.539343  |
| 16               | 6                | 0              | -4.865242               | -0.819654 | 0.890578  |
| 17               | 6                | 0              | -3.860208               | -0.389824 | 0.007240  |
| 18               | 6                | 0              | -4.014390               | -0.580313 | -1.378744 |
| 19               | 6                | 0              | -5.176756               | -1.197245 | -1.848056 |
| 20               | 6                | 0              | -6.154165               | -1.611153 | -0.969721 |
| 21               | 6                | 0              | -6.009930               | -1.427169 | 0.411254  |

|    |   |   |           |           |           |
|----|---|---|-----------|-----------|-----------|
| 22 | 8 | 0 | -3.082472 | -0.190035 | -2.254255 |
| 23 | 8 | 0 | -7.037082 | -1.874487 | 1.180507  |
| 24 | 6 | 0 | -6.932985 | -1.709488 | 2.578578  |
| 25 | 1 | 0 | 0.575733  | -1.002129 | 1.471981  |
| 26 | 1 | 0 | -2.347131 | 0.219662  | -1.720531 |
| 27 | 6 | 0 | -0.518575 | 2.770324  | -0.063625 |
| 28 | 6 | 0 | -0.424510 | 3.796120  | 0.871513  |
| 29 | 6 | 0 | -0.358604 | 5.122638  | 0.465136  |
| 30 | 6 | 0 | -0.391096 | 5.438244  | -0.885514 |
| 31 | 6 | 0 | -0.492631 | 4.420573  | -1.826167 |
| 32 | 6 | 0 | -0.556616 | 3.096313  | -1.418587 |
| 33 | 6 | 0 | 4.226302  | 2.528377  | 1.507346  |
| 34 | 6 | 0 | 3.362150  | 1.892688  | 2.389614  |
| 35 | 6 | 0 | 2.230988  | 1.246625  | 1.912506  |
| 36 | 6 | 0 | 1.946373  | 1.221994  | 0.548058  |
| 37 | 6 | 0 | 2.820087  | 1.860828  | -0.326986 |
| 38 | 6 | 0 | 3.952252  | 2.510310  | 0.147244  |
| 39 | 1 | 0 | 2.811348  | -3.128141 | 1.642758  |
| 40 | 1 | 0 | 5.266447  | -3.256575 | 1.761341  |
| 41 | 1 | 0 | 5.552067  | -1.533028 | -2.144661 |
| 42 | 1 | 0 | 3.089021  | -1.395407 | -2.262375 |
| 43 | 1 | 0 | 7.413382  | -3.350762 | 0.434813  |
| 44 | 1 | 0 | 7.476710  | -1.594321 | 0.456541  |
| 45 | 1 | 0 | 7.541144  | -2.448301 | -1.081695 |
| 46 | 1 | 0 | 0.745305  | 0.499422  | -1.067883 |
| 47 | 1 | 0 | -0.677009 | 1.320048  | 1.488638  |
| 48 | 1 | 0 | -4.717383 | -0.660966 | 1.950555  |
| 49 | 1 | 0 | -5.293912 | -1.343814 | -2.914128 |
| 50 | 1 | 0 | -7.054329 | -2.088862 | -1.335957 |
| 51 | 1 | 0 | -6.857651 | -0.653026 | 2.852562  |
| 52 | 1 | 0 | -6.070525 | -2.247917 | 2.982265  |
| 53 | 1 | 0 | -7.843770 | -2.124503 | 3.002970  |
| 54 | 1 | 0 | -0.403095 | 3.556546  | 1.928366  |
| 55 | 1 | 0 | -0.285440 | 5.909011  | 1.206459  |
| 56 | 1 | 0 | -0.342697 | 6.471925  | -1.205133 |
| 57 | 1 | 0 | -0.524996 | 4.659039  | -2.882327 |
| 58 | 1 | 0 | -0.647178 | 2.312237  | -2.160141 |
| 59 | 1 | 0 | 5.109206  | 3.033390  | 1.879135  |
| 60 | 1 | 0 | 3.567630  | 1.901189  | 3.453006  |
| 61 | 1 | 0 | 1.568408  | 0.761429  | 2.620553  |
| 62 | 1 | 0 | 2.612843  | 1.850723  | -1.390445 |
| 63 | 1 | 0 | 4.621239  | 3.000689  | -0.549224 |
| 64 | 1 | 0 | -2.621552 | 0.356313  | 1.629069  |

-----  
Conformer # 6

Energy: -1930.409518 Hartree

Center Atomic Atomic Coordinates (Angstroms)

| Number | Number | Type | X         | Y         | Z         |
|--------|--------|------|-----------|-----------|-----------|
| 1      | 6      | 0    | -4.335619 | 1.244275  | 0.283479  |
| 2      | 6      | 0    | -5.431581 | 0.654312  | 0.897379  |
| 3      | 6      | 0    | -5.951443 | -0.553870 | 0.440204  |
| 4      | 6      | 0    | -5.340653 | -1.164767 | -0.658684 |
| 5      | 6      | 0    | -4.245029 | -0.593569 | -1.279164 |
| 6      | 6      | 0    | -3.743782 | 0.614777  | -0.803053 |
| 7      | 6      | 0    | -7.147482 | -1.180712 | 1.091925  |
| 8      | 16     | 0    | -2.342971 | 1.349228  | -1.592571 |
| 9      | 8      | 0    | -2.310773 | 2.729236  | -1.202705 |
| 10     | 8      | 0    | -2.370119 | 0.972791  | -2.977629 |
| 11     | 7      | 0    | -0.994414 | 0.645740  | -0.984164 |
| 12     | 6      | 0    | -0.614186 | 0.817146  | 0.415990  |
| 13     | 6      | 0    | 0.170516  | -0.444994 | 0.894847  |
| 14     | 7      | 0    | 1.347079  | -0.633708 | 0.081380  |
| 15     | 6      | 0    | 2.498505  | -0.584930 | 0.636331  |
| 16     | 6      | 0    | 4.956485  | -0.706275 | 0.579769  |
| 17     | 6      | 0    | 3.729584  | -0.754280 | -0.105066 |
| 18     | 6      | 0    | 3.710350  | -0.964116 | -1.496412 |
| 19     | 6      | 0    | 4.921918  | -1.124448 | -2.172218 |
| 20     | 6      | 0    | 6.115776  | -1.077036 | -1.486801 |
| 21     | 6      | 0    | 6.147559  | -0.866338 | -0.101971 |
| 22     | 8      | 0    | 2.565158  | -1.012290 | -2.187077 |
| 23     | 8      | 0    | 7.381447  | -0.837195 | 0.464358  |
| 24     | 6      | 0    | 7.462376  | -0.619716 | 1.857297  |
| 25     | 1      | 0    | -0.858346 | -0.282088 | -1.364203 |
| 26     | 1      | 0    | 1.834128  | -0.868741 | -1.526659 |
| 27     | 6      | 0    | -0.714195 | -1.679010 | 0.894767  |
| 28     | 6      | 0    | -0.611275 | -2.670038 | -0.077534 |
| 29     | 6      | 0    | -1.449164 | -3.778952 | -0.047897 |
| 30     | 6      | 0    | -2.394237 | -3.915213 | 0.957323  |
| 31     | 6      | 0    | -2.497435 | -2.935263 | 1.937611  |
| 32     | 6      | 0    | -1.664237 | -1.827679 | 1.905184  |
| 33     | 6      | 0    | 1.723415  | 4.341405  | 1.222911  |
| 34     | 6      | 0    | 1.816953  | 3.721725  | -0.016341 |
| 35     | 6      | 0    | 1.054477  | 2.596283  | -0.296668 |

|    |   |   |           |           |           |
|----|---|---|-----------|-----------|-----------|
| 36 | 6 | 0 | 0.187238  | 2.076857  | 0.659546  |
| 37 | 6 | 0 | 0.095776  | 2.705705  | 1.898538  |
| 38 | 6 | 0 | 0.858129  | 3.830744  | 2.181044  |
| 39 | 1 | 0 | -3.953609 | 2.195319  | 0.628585  |
| 40 | 1 | 0 | -5.894371 | 1.148937  | 1.743064  |
| 41 | 1 | 0 | -5.734023 | -2.101489 | -1.035904 |
| 42 | 1 | 0 | -3.789690 | -1.069398 | -2.137512 |
| 43 | 1 | 0 | -7.426275 | -0.654906 | 2.004070  |
| 44 | 1 | 0 | -6.955628 | -2.225389 | 1.342633  |
| 45 | 1 | 0 | -8.007951 | -1.166055 | 0.418882  |
| 46 | 1 | 0 | -1.509538 | 0.854390  | 1.045727  |
| 47 | 1 | 0 | 0.449985  | -0.230520 | 1.933999  |
| 48 | 1 | 0 | 4.940492  | -0.541303 | 1.648823  |
| 49 | 1 | 0 | 4.904435  | -1.285722 | -3.242386 |
| 50 | 1 | 0 | 7.054797  | -1.201566 | -2.011502 |
| 51 | 1 | 0 | 8.520662  | -0.628491 | 2.105585  |
| 52 | 1 | 0 | 6.955285  | -1.411728 | 2.416004  |
| 53 | 1 | 0 | 7.035253  | 0.347884  | 2.136185  |
| 54 | 1 | 0 | 0.141233  | -2.589973 | -0.851178 |
| 55 | 1 | 0 | -1.353603 | -4.540998 | -0.811637 |
| 56 | 1 | 0 | -3.041746 | -4.782782 | 0.984211  |
| 57 | 1 | 0 | -3.223365 | -3.037498 | 2.734815  |
| 58 | 1 | 0 | -1.745359 | -1.074857 | 2.681508  |
| 59 | 1 | 0 | 2.315816  | 5.222321  | 1.437743  |
| 60 | 1 | 0 | 2.484940  | 4.117564  | -0.771722 |
| 61 | 1 | 0 | 1.120399  | 2.123574  | -1.267648 |
| 62 | 1 | 0 | -0.586309 | 2.318836  | 2.648198  |
| 63 | 1 | 0 | 0.769117  | 4.312978  | 3.146925  |
| 64 | 1 | 0 | 2.594025  | -0.412654 | 1.714422  |

-----

Conformer # 7

Energy: -1930.409149 Hartree

| Center<br>Number | Atomic<br>Number | Atomic<br>Type | Coordinates (Angstroms) |           |           |
|------------------|------------------|----------------|-------------------------|-----------|-----------|
|                  |                  |                | X                       | Y         | Z         |
| 1                | 6                | 0              | -3.556230               | -2.187954 | -0.895758 |
| 2                | 6                | 0              | -4.488839               | -2.825477 | -0.092145 |
| 3                | 6                | 0              | -5.631906               | -2.163836 | 0.353146  |
| 4                | 6                | 0              | -5.824359               | -0.837843 | -0.039965 |
| 5                | 6                | 0              | -4.904125               | -0.186712 | -0.842550 |
| 6                | 6                | 0              | -3.766471               | -0.866242 | -1.265020 |

|    |    |   |           |           |           |
|----|----|---|-----------|-----------|-----------|
| 7  | 6  | 0 | -6.623085 | -2.850357 | 1.244281  |
| 8  | 16 | 0 | -2.581365 | -0.034406 | -2.277978 |
| 9  | 8  | 0 | -3.289890 | 0.932442  | -3.068468 |
| 10 | 8  | 0 | -1.763986 | -1.040034 | -2.897129 |
| 11 | 7  | 0 | -1.595996 | 0.843951  | -1.318448 |
| 12 | 6  | 0 | -0.559434 | 0.252344  | -0.486272 |
| 13 | 6  | 0 | 0.720998  | 1.149079  | -0.615161 |
| 14 | 7  | 0 | 1.825063  | 0.494198  | 0.048350  |
| 15 | 6  | 0 | 2.838042  | 0.143489  | -0.649094 |
| 16 | 6  | 0 | 5.070291  | -0.864988 | -0.897853 |
| 17 | 6  | 0 | 3.987895  | -0.519087 | -0.070614 |
| 18 | 6  | 0 | 4.030769  | -0.817901 | 1.303957  |
| 19 | 6  | 0 | 5.160913  | -1.456608 | 1.819793  |
| 20 | 6  | 0 | 6.214407  | -1.788575 | 0.996308  |
| 21 | 6  | 0 | 6.181617  | -1.496946 | -0.373433 |
| 22 | 8  | 0 | 3.021038  | -0.510119 | 2.125739  |
| 23 | 8  | 0 | 7.275588  | -1.871389 | -1.086042 |
| 24 | 6  | 0 | 7.285310  | -1.596982 | -2.471238 |
| 25 | 1  | 0 | -2.004315 | 1.718462  | -1.019589 |
| 26 | 1  | 0 | 2.324356  | -0.068366 | 1.565207  |
| 27 | 6  | 0 | 0.521676  | 2.558392  | -0.099112 |
| 28 | 6  | 0 | 0.740023  | 2.895628  | 1.236016  |
| 29 | 6  | 0 | 0.536385  | 4.195481  | 1.677371  |
| 30 | 6  | 0 | 0.109000  | 5.178127  | 0.793778  |
| 31 | 6  | 0 | -0.104892 | 4.854569  | -0.538675 |
| 32 | 6  | 0 | 0.105702  | 3.555122  | -0.981394 |
| 33 | 6  | 0 | -1.683695 | -0.643069 | 3.579502  |
| 34 | 6  | 0 | -2.180279 | 0.497657  | 2.963855  |
| 35 | 6  | 0 | -1.829416 | 0.794418  | 1.653694  |
| 36 | 6  | 0 | -0.979676 | -0.045172 | 0.936968  |
| 37 | 6  | 0 | -0.494352 | -1.191949 | 1.563064  |
| 38 | 6  | 0 | -0.839134 | -1.489214 | 2.873971  |
| 39 | 1  | 0 | -2.680406 | -2.714138 | -1.249616 |
| 40 | 1  | 0 | -4.327565 | -3.859829 | 0.187662  |
| 41 | 1  | 0 | -6.714820 | -0.310061 | 0.280865  |
| 42 | 1  | 0 | -5.073493 | 0.835336  | -1.154511 |
| 43 | 1  | 0 | -6.415161 | -2.625310 | 2.293760  |
| 44 | 1  | 0 | -6.581351 | -3.932785 | 1.127143  |
| 45 | 1  | 0 | -7.640520 | -2.517869 | 1.037579  |
| 46 | 1  | 0 | -0.292252 | -0.688827 | -0.967673 |
| 47 | 1  | 0 | 0.906370  | 1.211813  | -1.694444 |
| 48 | 1  | 0 | 5.008055  | -0.622968 | -1.950489 |
| 49 | 1  | 0 | 5.192687  | -1.685496 | 2.877293  |
| 50 | 1  | 0 | 7.089691  | -2.283734 | 1.397943  |

|    |   |   |           |           |           |
|----|---|---|-----------|-----------|-----------|
| 51 | 1 | 0 | 8.233645  | -1.970853 | -2.848873 |
| 52 | 1 | 0 | 7.218635  | -0.522825 | -2.666845 |
| 53 | 1 | 0 | 6.466594  | -2.107982 | -2.986140 |
| 54 | 1 | 0 | 1.082254  | 2.141137  | 1.930941  |
| 55 | 1 | 0 | 0.715101  | 4.441473  | 2.717058  |
| 56 | 1 | 0 | -0.047198 | 6.192262  | 1.140410  |
| 57 | 1 | 0 | -0.425873 | 5.615226  | -1.239804 |
| 58 | 1 | 0 | -0.044340 | 3.313843  | -2.027336 |
| 59 | 1 | 0 | -1.958471 | -0.874249 | 4.601266  |
| 60 | 1 | 0 | -2.844044 | 1.161722  | 3.503807  |
| 61 | 1 | 0 | -2.231444 | 1.689963  | 1.196708  |
| 62 | 1 | 0 | 0.155834  | -1.863403 | 1.015196  |
| 63 | 1 | 0 | -0.451343 | -2.386037 | 3.341143  |
| 64 | 1 | 0 | 2.872931  | 0.337397  | -1.727635 |

-----

Conformer # 8

Energy: -1930.409106 Hartree

| Center<br>Number | Atomic<br>Number | Atomic<br>Type | Coordinates (Angstroms) |           |           |
|------------------|------------------|----------------|-------------------------|-----------|-----------|
|                  |                  |                | X                       | Y         | Z         |
| 1                | 6                | 0              | 3.094520                | -2.822574 | 0.539198  |
| 2                | 6                | 0              | 4.293972                | -3.072739 | 1.179617  |
| 3                | 6                | 0              | 5.482092                | -2.474195 | 0.750691  |
| 4                | 6                | 0              | 5.431216                | -1.611839 | -0.341796 |
| 5                | 6                | 0              | 4.235797                | -1.349108 | -0.995169 |
| 6                | 6                | 0              | 3.072258                | -1.955571 | -0.548281 |
| 7                | 6                | 0              | 6.780282                | -2.776892 | 1.437065  |
| 8                | 16               | 0              | 1.550611                | -1.664387 | -1.390305 |
| 9                | 8                | 0              | 0.852669                | -2.917144 | -1.505977 |
| 10               | 8                | 0              | 1.847517                | -0.896036 | -2.569765 |
| 11               | 7                | 0              | 0.642050                | -0.774687 | -0.337866 |
| 12               | 6                | 0              | 0.645092                | 0.690167  | -0.430235 |
| 13               | 6                | 0              | -0.623682               | 1.207364  | 0.298736  |
| 14               | 7                | 0              | -1.792717               | 0.537559  | -0.243093 |
| 15               | 6                | 0              | -2.654225               | 0.041541  | 0.565305  |
| 16               | 6                | 0              | -4.765830               | -1.121987 | 1.055715  |
| 17               | 6                | 0              | -3.865565               | -0.602091 | 0.108464  |
| 18               | 6                | 0              | -4.153783               | -0.705273 | -1.265865 |
| 19               | 6                | 0              | -5.341841               | -1.326383 | -1.659537 |
| 20               | 6                | 0              | -6.213562               | -1.829579 | -0.719611 |
| 21               | 6                | 0              | -5.935952               | -1.733742 | 0.650584  |



|    |   |   |           |           |           |
|----|---|---|-----------|-----------|-----------|
| 22 | 8 | 0 | -3.326409 | -0.229172 | -2.201523 |
| 23 | 8 | 0 | -6.868341 | -2.265152 | 1.482579  |
| 24 | 6 | 0 | -6.628359 | -2.193894 | 2.872372  |
| 25 | 1 | 0 | -0.293503 | -1.168739 | -0.334635 |
| 26 | 1 | 0 | -2.552586 | 0.171256  | -1.720643 |
| 27 | 6 | 0 | -0.763492 | 2.707974  | 0.143209  |
| 28 | 6 | 0 | -0.561047 | 3.543827  | 1.236792  |
| 29 | 6 | 0 | -0.681327 | 4.921486  | 1.106487  |
| 30 | 6 | 0 | -1.010571 | 5.477817  | -0.121154 |
| 31 | 6 | 0 | -1.220500 | 4.649407  | -1.216779 |
| 32 | 6 | 0 | -1.097842 | 3.273926  | -1.085887 |
| 33 | 6 | 0 | 4.172409  | 2.462274  | 1.284007  |
| 34 | 6 | 0 | 3.733094  | 2.853022  | 0.027080  |
| 35 | 6 | 0 | 2.602885  | 2.267044  | -0.528329 |
| 36 | 6 | 0 | 1.899114  | 1.287877  | 0.164943  |
| 37 | 6 | 0 | 2.349709  | 0.897171  | 1.424227  |
| 38 | 6 | 0 | 3.477933  | 1.480620  | 1.980934  |
| 39 | 1 | 0 | 2.182627  | -3.298420 | 0.875335  |
| 40 | 1 | 0 | 4.312141  | -3.747201 | 2.027687  |
| 41 | 1 | 0 | 6.340274  | -1.135846 | -0.689714 |
| 42 | 1 | 0 | 4.201944  | -0.682481 | -1.845520 |
| 43 | 1 | 0 | 6.649636  | -2.853685 | 2.516957  |
| 44 | 1 | 0 | 7.527386  | -2.011000 | 1.232136  |
| 45 | 1 | 0 | 7.183684  | -3.732669 | 1.092271  |
| 46 | 1 | 0 | 0.570569  | 0.996494  | -1.476949 |
| 47 | 1 | 0 | -0.515369 | 0.978616  | 1.366332  |
| 48 | 1 | 0 | -4.516869 | -1.027853 | 2.104309  |
| 49 | 1 | 0 | -5.562578 | -1.404790 | -2.716267 |
| 50 | 1 | 0 | -7.133487 | -2.310892 | -1.027264 |
| 51 | 1 | 0 | -7.479548 | -2.669496 | 3.352940  |
| 52 | 1 | 0 | -6.555800 | -1.156992 | 3.213163  |
| 53 | 1 | 0 | -5.714575 | -2.728176 | 3.148194  |
| 54 | 1 | 0 | -0.305036 | 3.114286  | 2.198236  |
| 55 | 1 | 0 | -0.519038 | 5.558750  | 1.967177  |
| 56 | 1 | 0 | -1.107160 | 6.551587  | -0.224329 |
| 57 | 1 | 0 | -1.482883 | 5.075723  | -2.177335 |
| 58 | 1 | 0 | -1.274651 | 2.636090  | -1.942895 |
| 59 | 1 | 0 | 5.054845  | 2.916293  | 1.717914  |
| 60 | 1 | 0 | 4.271740  | 3.612855  | -0.525801 |
| 61 | 1 | 0 | 2.265994  | 2.570589  | -1.512472 |
| 62 | 1 | 0 | 1.821451  | 0.120824  | 1.964100  |
| 63 | 1 | 0 | 3.818724  | 1.166189  | 2.959888  |
| 64 | 1 | 0 | -2.503287 | 0.094924  | 1.649576  |

-----  
Conformer # 9

Energy: -1930.409003 Hartree

Center Atomic Atomic Coordinates (Angstroms)

| Number | Number | Type | X         | Y         | Z         |
|--------|--------|------|-----------|-----------|-----------|
| 1      | 6      | 0    | -3.394323 | -2.817901 | -0.828898 |
| 2      | 6      | 0    | -4.771962 | -2.932318 | -0.858834 |
| 3      | 6      | 0    | -5.555870 | -2.531210 | 0.226443  |
| 4      | 6      | 0    | -4.914142 | -2.009255 | 1.346678  |
| 5      | 6      | 0    | -3.532865 | -1.883839 | 1.391589  |
| 6      | 6      | 0    | -2.777383 | -2.288766 | 0.301176  |
| 7      | 6      | 0    | -7.047214 | -2.680116 | 0.184215  |
| 8      | 16     | 0    | -1.016467 | -2.134839 | 0.341234  |
| 9      | 8      | 0    | -0.474441 | -3.249940 | -0.383001 |
| 10     | 8      | 0    | -0.638591 | -1.880455 | 1.702603  |
| 11     | 7      | 0    | -0.583521 | -0.818698 | -0.522428 |
| 12     | 6      | 0    | -0.762584 | 0.549971  | -0.047372 |
| 13     | 6      | 0    | 0.496256  | 1.376451  | -0.438671 |
| 14     | 7      | 0    | 1.673488  | 0.751049  | 0.123859  |
| 15     | 6      | 0    | 2.602906  | 0.359690  | -0.658835 |
| 16     | 6      | 0    | 4.808066  | -0.636343 | -1.081791 |
| 17     | 6      | 0    | 3.822737  | -0.253103 | -0.170628 |
| 18     | 6      | 0    | 4.029576  | -0.462242 | 1.211368  |
| 19     | 6      | 0    | 5.220456  | -1.047675 | 1.626321  |
| 20     | 6      | 0    | 6.191405  | -1.421783 | 0.709366  |
| 21     | 6      | 0    | 5.992182  | -1.218175 | -0.657427 |
| 22     | 8      | 0    | 3.111702  | -0.112957 | 2.121187  |
| 23     | 8      | 0    | 6.885596  | -1.551264 | -1.626995 |
| 24     | 6      | 0    | 8.102906  | -2.147767 | -1.231066 |
| 25     | 1      | 0    | -0.639005 | -0.973995 | -1.519704 |
| 26     | 1      | 0    | 2.350465  | 0.283232  | 1.618040  |
| 27     | 6      | 0    | 0.397767  | 2.808433  | 0.045502  |
| 28     | 6      | 0    | 0.271663  | 3.848388  | -0.869961 |
| 29     | 6      | 0    | 0.181791  | 5.165656  | -0.438906 |
| 30     | 6      | 0    | 0.222178  | 5.457765  | 0.916821  |
| 31     | 6      | 0    | 0.355724  | 4.425898  | 1.837836  |
| 32     | 6      | 0    | 0.443761  | 3.110860  | 1.405659  |
| 33     | 6      | 0    | -4.375568 | 2.447365  | -1.438974 |
| 34     | 6      | 0    | -3.505245 | 1.858018  | -2.346974 |
| 35     | 6      | 0    | -2.345148 | 1.241911  | -1.900777 |

|    |   |   |           |           |           |
|----|---|---|-----------|-----------|-----------|
| 36 | 6 | 0 | -2.037379 | 1.201243  | -0.541695 |
| 37 | 6 | 0 | -2.917039 | 1.794239  | 0.359248  |
| 38 | 6 | 0 | -4.078386 | 2.413412  | -0.084084 |
| 39 | 1 | 0 | -2.798759 | -3.149185 | -1.669510 |
| 40 | 1 | 0 | -5.250325 | -3.346563 | -1.738754 |
| 41 | 1 | 0 | -5.502083 | -1.697331 | 2.201747  |
| 42 | 1 | 0 | -3.040881 | -1.488987 | 2.269631  |
| 43 | 1 | 0 | -7.332392 | -3.734588 | 0.211277  |
| 44 | 1 | 0 | -7.458406 | -2.261118 | -0.735689 |
| 45 | 1 | 0 | -7.521653 | -2.183439 | 1.029408  |
| 46 | 1 | 0 | -0.784656 | 0.493305  | 1.040823  |
| 47 | 1 | 0 | 0.555319  | 1.389816  | -1.535613 |
| 48 | 1 | 0 | 4.651004  | -0.476944 | -2.142163 |
| 49 | 1 | 0 | 5.379271  | -1.208706 | 2.684998  |
| 50 | 1 | 0 | 7.103841  | -1.873979 | 1.072345  |
| 51 | 1 | 0 | 8.662492  | -2.329743 | -2.145263 |
| 52 | 1 | 0 | 7.935935  | -3.098903 | -0.717541 |
| 53 | 1 | 0 | 8.682538  | -1.485308 | -0.581849 |
| 54 | 1 | 0 | 0.244417  | 3.627367  | -1.930712 |
| 55 | 1 | 0 | 0.083698  | 5.963377  | -1.165073 |
| 56 | 1 | 0 | 0.154938  | 6.484284  | 1.255519  |
| 57 | 1 | 0 | 0.394367  | 4.646079  | 2.897739  |
| 58 | 1 | 0 | 0.559153  | 2.315793  | 2.131971  |
| 59 | 1 | 0 | -5.281112 | 2.928713  | -1.786922 |
| 60 | 1 | 0 | -3.728572 | 1.879476  | -3.406588 |
| 61 | 1 | 0 | -1.678443 | 0.792769  | -2.628583 |
| 62 | 1 | 0 | -2.691626 | 1.771916  | 1.418826  |
| 63 | 1 | 0 | -4.751702 | 2.867734  | 0.632379  |
| 64 | 1 | 0 | 2.516149  | 0.479973  | -1.744834 |

-----

Conformer # 10

Energy: -1930.408758 Hartree

| Center | Atomic | Atomic | Coordinates (Angstroms) |           |           |
|--------|--------|--------|-------------------------|-----------|-----------|
| Number | Number | Type   | X                       | Y         | Z         |
| 1      | 6      | 0      | -4.397754               | 1.245125  | 0.168198  |
| 2      | 6      | 0      | -5.509858               | 0.672099  | 0.768832  |
| 3      | 6      | 0      | -6.004668               | -0.558963 | 0.345657  |
| 4      | 6      | 0      | -5.350926               | -1.210784 | -0.703676 |
| 5      | 6      | 0      | -4.239701               | -0.655917 | -1.311290 |
| 6      | 6      | 0      | -3.764764               | 0.576222  | -0.870774 |

|    |    |   |           |           |           |
|----|----|---|-----------|-----------|-----------|
| 7  | 6  | 0 | -7.221608 | -1.165254 | 0.977717  |
| 8  | 16 | 0 | -2.344608 | 1.290966  | -1.643610 |
| 9  | 8  | 0 | -2.327417 | 2.682177  | -1.294887 |
| 10 | 8  | 0 | -2.331302 | 0.873587  | -3.017237 |
| 11 | 7  | 0 | -1.011625 | 0.608787  | -0.978086 |
| 12 | 6  | 0 | -0.685507 | 0.799266  | 0.433122  |
| 13 | 6  | 0 | 0.105525  | -0.443752 | 0.949620  |
| 14 | 7  | 0 | 1.317104  | -0.611767 | 0.183930  |
| 15 | 6  | 0 | 2.441500  | -0.541741 | 0.787085  |
| 16 | 6  | 0 | 4.895132  | -0.621753 | 0.828927  |
| 17 | 6  | 0 | 3.707526  | -0.687273 | 0.097728  |
| 18 | 6  | 0 | 3.758163  | -0.890978 | -1.299114 |
| 19 | 6  | 0 | 4.998833  | -1.022827 | -1.911294 |
| 20 | 6  | 0 | 6.170060  | -0.957437 | -1.171759 |
| 21 | 6  | 0 | 6.127600  | -0.755442 | 0.209435  |
| 22 | 8  | 0 | 2.643766  | -0.956682 | -2.040594 |
| 23 | 8  | 0 | 7.221253  | -0.677368 | 1.012270  |
| 24 | 6  | 0 | 8.494858  | -0.804442 | 0.414577  |
| 25 | 1  | 0 | -0.859905 | -0.324625 | -1.338451 |
| 26 | 1  | 0 | 1.882457  | -0.831788 | -1.414510 |
| 27 | 6  | 0 | -0.753103 | -1.695625 | 0.923901  |
| 28 | 6  | 0 | -0.597527 | -2.690149 | -0.037915 |
| 29 | 6  | 0 | -1.413923 | -3.815531 | -0.028563 |
| 30 | 6  | 0 | -2.389055 | -3.964855 | 0.945743  |
| 31 | 6  | 0 | -2.545185 | -2.980898 | 1.914880  |
| 32 | 6  | 0 | -1.734409 | -1.856598 | 1.901966  |
| 33 | 6  | 0 | 1.552788  | 4.374277  | 1.295322  |
| 34 | 6  | 0 | 1.701209  | 3.748919  | 0.064240  |
| 35 | 6  | 0 | 0.971743  | 2.606376  | -0.234083 |
| 36 | 6  | 0 | 0.082580  | 2.075906  | 0.695331  |
| 37 | 6  | 0 | -0.063862 | 2.710169  | 1.926337  |
| 38 | 6  | 0 | 0.666108  | 3.851815  | 2.227175  |
| 39 | 1  | 0 | -4.033792 | 2.212258  | 0.487079  |
| 40 | 1  | 0 | -6.004636 | 1.197337  | 1.577190  |
| 41 | 1  | 0 | -5.723229 | -2.166922 | -1.052346 |
| 42 | 1  | 0 | -3.751778 | -1.163919 | -2.132490 |
| 43 | 1  | 0 | -8.076790 | -1.110442 | 0.299573  |
| 44 | 1  | 0 | -7.492615 | -0.649381 | 1.897877  |
| 45 | 1  | 0 | -7.062479 | -2.219860 | 1.207377  |
| 46 | 1  | 0 | -1.603412 | 0.824443  | 1.030300  |
| 47 | 1  | 0 | 0.340380  | -0.218413 | 1.997394  |
| 48 | 1  | 0 | 4.859030  | -0.464196 | 1.900414  |
| 49 | 1  | 0 | 5.037259  | -1.177882 | -2.981935 |
| 50 | 1  | 0 | 7.115820  | -1.064906 | -1.684226 |

|    |   |   |           |           |           |
|----|---|---|-----------|-----------|-----------|
| 51 | 1 | 0 | 9.218064  | -0.712030 | 1.220965  |
| 52 | 1 | 0 | 8.674159  | -0.014397 | -0.320156 |
| 53 | 1 | 0 | 8.617170  | -1.778858 | -0.066790 |
| 54 | 1 | 0 | 0.179093  | -2.599378 | -0.786166 |
| 55 | 1 | 0 | -1.277379 | -4.580287 | -0.783302 |
| 56 | 1 | 0 | -3.019115 | -4.845501 | 0.957018  |
| 57 | 1 | 0 | -3.295588 | -3.092851 | 2.687727  |
| 58 | 1 | 0 | -1.857106 | -1.100569 | 2.669614  |
| 59 | 1 | 0 | 2.119779  | 5.268193  | 1.524438  |
| 60 | 1 | 0 | 2.386669  | 4.153595  | -0.670482 |
| 61 | 1 | 0 | 1.080183  | 2.128694  | -1.198691 |
| 62 | 1 | 0 | -0.763231 | 2.313566  | 2.654707  |
| 63 | 1 | 0 | 0.535220  | 4.337445  | 3.186552  |
| 64 | 1 | 0 | 2.490096  | -0.367366 | 1.867803  |

-----

Conformer # 11

Energy: -1930.408483 Hartree

| Center<br>Number | Atomic<br>Number | Atomic<br>Type | Coordinates (Angstroms) |           |           |
|------------------|------------------|----------------|-------------------------|-----------|-----------|
|                  |                  |                | X                       | Y         | Z         |
| 1                | 6                | 0              | -3.549321               | -2.237946 | -0.921632 |
| 2                | 6                | 0              | -4.433414               | -2.936088 | -0.113431 |
| 3                | 6                | 0              | -5.581484               | -2.330279 | 0.393846  |
| 4                | 6                | 0              | -5.829630               | -0.997564 | 0.058649  |
| 5                | 6                | 0              | -4.958471               | -0.286402 | -0.747606 |
| 6                | 6                | 0              | -3.814310               | -0.911168 | -1.232635 |
| 7                | 6                | 0              | -6.519913               | -3.082107 | 1.289352  |
| 8                | 16               | 0              | -2.691234               | -0.002673 | -2.250299 |
| 9                | 8                | 0              | -3.456789               | 0.965692  | -2.983608 |
| 10               | 8                | 0              | -1.859521               | -0.956215 | -2.929734 |
| 11               | 7                | 0              | -1.706939               | 0.875885  | -1.289295 |
| 12               | 6                | 0              | -0.628712               | 0.289466  | -0.507643 |
| 13               | 6                | 0              | 0.625413                | 1.219626  | -0.655171 |
| 14               | 7                | 0              | 1.766610                | 0.570674  | -0.050414 |
| 15               | 6                | 0              | 2.763688                | 0.271346  | -0.791141 |
| 16               | 6                | 0              | 5.008350                | -0.666225 | -1.134473 |
| 17               | 6                | 0              | 3.949150                | -0.381185 | -0.271044 |
| 18               | 6                | 0              | 4.047333                | -0.731550 | 1.094162  |
| 19               | 6                | 0              | 5.206668                | -1.353942 | 1.542254  |
| 20               | 6                | 0              | 6.251466                | -1.629851 | 0.672955  |
| 21               | 6                | 0              | 6.160224                | -1.287169 | -0.677579 |

|    |   |   |           |           |           |
|----|---|---|-----------|-----------|-----------|
| 22 | 8 | 0 | 3.054357  | -0.481400 | 1.957921  |
| 23 | 8 | 0 | 7.131089  | -1.518415 | -1.600303 |
| 24 | 6 | 0 | 8.319246  | -2.149585 | -1.170353 |
| 25 | 1 | 0 | -2.137039 | 1.723008  | -0.945473 |
| 26 | 1 | 0 | 2.330474  | -0.038537 | 1.437414  |
| 27 | 6 | 0 | 0.414514  | 2.608114  | -0.089875 |
| 28 | 6 | 0 | 0.679766  | 2.912411  | 1.244639  |
| 29 | 6 | 0 | 0.463871  | 4.193710  | 1.732111  |
| 30 | 6 | 0 | -0.022879 | 5.190179  | 0.896058  |
| 31 | 6 | 0 | -0.283766 | 4.899520  | -0.435623 |
| 32 | 6 | 0 | -0.060798 | 3.618985  | -0.924831 |
| 33 | 6 | 0 | -1.596064 | -0.733248 | 3.568529  |
| 34 | 6 | 0 | -2.132358 | 0.414613  | 3.001395  |
| 35 | 6 | 0 | -1.832085 | 0.752068  | 1.688561  |
| 36 | 6 | 0 | -0.994212 | -0.053440 | 0.920432  |
| 37 | 6 | 0 | -0.468339 | -1.207534 | 1.498438  |
| 38 | 6 | 0 | -0.762459 | -1.545378 | 2.811898  |
| 39 | 1 | 0 | -2.669498 | -2.720980 | -1.323761 |
| 40 | 1 | 0 | -4.229456 | -3.974236 | 0.120737  |
| 41 | 1 | 0 | -6.725270 | -0.512238 | 0.428383  |
| 42 | 1 | 0 | -5.171037 | 0.740407  | -1.014219 |
| 43 | 1 | 0 | -6.292007 | -2.880292 | 2.339395  |
| 44 | 1 | 0 | -6.439648 | -4.158031 | 1.137640  |
| 45 | 1 | 0 | -7.554873 | -2.784175 | 1.120149  |
| 46 | 1 | 0 | -0.355680 | -0.632534 | -1.021804 |
| 47 | 1 | 0 | 0.770690  | 1.318090  | -1.737820 |
| 48 | 1 | 0 | 4.935001  | -0.398895 | -2.182101 |
| 49 | 1 | 0 | 5.282121  | -1.622220 | 2.588326  |
| 50 | 1 | 0 | 7.136635  | -2.114884 | 1.060086  |
| 51 | 1 | 0 | 8.950862  | -2.237745 | -2.050780 |
| 52 | 1 | 0 | 8.121389  | -3.147830 | -0.769620 |
| 53 | 1 | 0 | 8.839196  | -1.554479 | -0.414225 |
| 54 | 1 | 0 | 1.068210  | 2.147217  | 1.902580  |
| 55 | 1 | 0 | 0.679601  | 4.414291  | 2.770479  |
| 56 | 1 | 0 | -0.188633 | 6.189819  | 1.278496  |
| 57 | 1 | 0 | -0.651275 | 5.671670  | -1.100406 |
| 58 | 1 | 0 | -0.247867 | 3.404059  | -1.970519 |
| 59 | 1 | 0 | -1.831422 | -0.996158 | 4.592456  |
| 60 | 1 | 0 | -2.787618 | 1.052642  | 3.581615  |
| 61 | 1 | 0 | -2.263817 | 1.652986  | 1.270848  |
| 62 | 1 | 0 | 0.173855  | -1.852599 | 0.910893  |
| 63 | 1 | 0 | -0.343738 | -2.447266 | 3.241069  |
| 64 | 1 | 0 | 2.760956  | 0.502215  | -1.862748 |

-----  
Conformer # 12

Energy: -1930.408478

| Center<br>Number | Atomic<br>Number | Atomic<br>Type | Coordinates (Angstroms) |           |           |
|------------------|------------------|----------------|-------------------------|-----------|-----------|
|                  |                  |                | X                       | Y         | Z         |
| 1                | 6                | 0              | -3.065221               | -2.890882 | -0.566554 |
| 2                | 6                | 0              | -4.265500               | -3.172873 | -1.192281 |
| 3                | 6                | 0              | -5.465277               | -2.615559 | -0.741215 |
| 4                | 6                | 0              | -5.425405               | -1.760763 | 0.357800  |
| 5                | 6                | 0              | -4.229542               | -1.466397 | 0.996459  |
| 6                | 6                | 0              | -3.054273               | -2.032977 | 0.528143  |
| 7                | 6                | 0              | -6.763626               | -2.953068 | -1.410831 |
| 8                | 16               | 0              | -1.530047               | -1.702020 | 1.350933  |
| 9                | 8                | 0              | -0.791439               | -2.933264 | 1.442116  |
| 10               | 8                | 0              | -1.833716               | -0.955956 | 2.542906  |
| 11               | 7                | 0              | -0.665646               | -0.772096 | 0.296130  |
| 12               | 6                | 0              | -0.706725               | 0.690664  | 0.410101  |
| 13               | 6                | 0              | 0.531503                | 1.253695  | -0.336354 |
| 14               | 7                | 0              | 1.730519                | 0.604664  | 0.165463  |
| 15               | 6                | 0              | 2.587269                | 0.155903  | -0.672880 |
| 16               | 6                | 0              | 4.718742                | -0.926867 | -1.228220 |
| 17               | 6                | 0              | 3.827558                | -0.464611 | -0.257192 |
| 18               | 6                | 0              | 4.151850                | -0.601998 | 1.111590  |
| 19               | 6                | 0              | 5.360282                | -1.198368 | 1.453964  |
| 20               | 6                | 0              | 6.235009                | -1.651956 | 0.478768  |
| 21               | 6                | 0              | 5.920470                | -1.519215 | -0.875699 |
| 22               | 8                | 0              | 3.329352                | -0.176246 | 2.078174  |
| 23               | 8                | 0              | 6.715696                | -1.933032 | -1.897009 |
| 24               | 6                | 0              | 7.948637                | -2.542531 | -1.574236 |
| 25               | 1                | 0              | 0.279445                | -1.141305 | 0.267420  |
| 26               | 1                | 0              | 2.537022                | 0.216895  | 1.626299  |
| 27               | 6                | 0              | 0.639012                | 2.753864  | -0.154629 |
| 28               | 6                | 0              | 0.974199                | 3.304890  | 1.081085  |
| 29               | 6                | 0              | 1.069912                | 4.680117  | 1.235028  |
| 30               | 6                | 0              | 0.831339                | 5.523006  | 0.156437  |
| 31               | 6                | 0              | 0.500845                | 4.981643  | -1.077520 |
| 32               | 6                | 0              | 0.407998                | 3.604288  | -1.231147 |
| 33               | 6                | 0              | -4.313769               | 2.388079  | -1.211334 |
| 34               | 6                | 0              | -3.604749               | 1.437704  | -1.936369 |
| 35               | 6                | 0              | -2.450217               | 0.878240  | -1.409761 |

|    |   |   |           |           |           |
|----|---|---|-----------|-----------|-----------|
| 36 | 6 | 0 | -1.987574 | 1.262306  | -0.152818 |
| 37 | 6 | 0 | -2.705234 | 2.210788  | 0.568256  |
| 38 | 6 | 0 | -3.862108 | 2.772339  | 0.043205  |
| 39 | 1 | 0 | -2.143897 | -3.335100 | -0.919810 |
| 40 | 1 | 0 | -4.274857 | -3.840143 | -2.046143 |
| 41 | 1 | 0 | -6.343664 | -1.315903 | 0.722427  |
| 42 | 1 | 0 | -4.203935 | -0.805305 | 1.851379  |
| 43 | 1 | 0 | -6.641706 | -3.043914 | -2.490544 |
| 44 | 1 | 0 | -7.523238 | -2.198368 | -1.210059 |
| 45 | 1 | 0 | -7.146050 | -3.910631 | -1.047379 |
| 46 | 1 | 0 | -0.620651 | 0.984172  | 1.459601  |
| 47 | 1 | 0 | 0.404513  | 1.042586  | -1.405385 |
| 48 | 1 | 0 | 4.471768  | -0.821743 | -2.278091 |
| 49 | 1 | 0 | 5.609063  | -1.304146 | 2.502152  |
| 50 | 1 | 0 | 7.164521  | -2.110574 | 0.786051  |
| 51 | 1 | 0 | 8.417975  | -2.795849 | -2.521532 |
| 52 | 1 | 0 | 7.804234  | -3.455707 | -0.990055 |
| 53 | 1 | 0 | 8.601335  | -1.860582 | -1.021839 |
| 54 | 1 | 0 | 1.172883  | 2.655947  | 1.924929  |
| 55 | 1 | 0 | 1.333507  | 5.094974  | 2.200256  |
| 56 | 1 | 0 | 0.906676  | 6.596582  | 0.277731  |
| 57 | 1 | 0 | 0.316340  | 5.630409  | -1.925028 |
| 58 | 1 | 0 | 0.151784  | 3.186470  | -2.197681 |
| 59 | 1 | 0 | -5.216871 | 2.822882  | -1.621771 |
| 60 | 1 | 0 | -3.954815 | 1.128713  | -2.913786 |
| 61 | 1 | 0 | -1.910341 | 0.125749  | -1.971438 |
| 62 | 1 | 0 | -2.357895 | 2.509366  | 1.550299  |
| 63 | 1 | 0 | -4.411507 | 3.507962  | 0.617794  |
| 64 | 1 | 0 | 2.413438  | 0.232122  | -1.752136 |

-----

CompareVOA results (6-311G(3df,2pd) / B3PW91):

Optimal Scaling Factor = 0.978

$S_{fg}$  (IR) = 87.8

$S_{fg}$  (VCD R,R-config) = 75.1

$S_{fg}$  (VCD S,S-config) = 15.8

ESI (Enantiomeric Similarity Index) = 59.2

Confidence Level = 99

Compound (**JQ1**) :



cc-pVTZ / B3PW91 (CPCM / Chloroform) : 6 conformers used in Boltzmann average.

S enantiomer was calculated

Conformer # 1

Energy: -2119.277312 Hartree

| Center Number | Atomic Number | Atomic Type | Coordinates (Angstroms) |           |           |
|---------------|---------------|-------------|-------------------------|-----------|-----------|
|               |               |             | X                       | Y         | Z         |
| 1             | 16            | 0           | 2.575949                | -3.052609 | 1.089001  |
| 2             | 6             | 0           | 2.849859                | -1.762091 | 2.208050  |
| 3             | 6             | 0           | 2.189270                | -0.622414 | 1.841291  |
| 4             | 6             | 0           | 1.453175                | -0.783857 | 0.618239  |
| 5             | 6             | 0           | 1.570505                | -2.057115 | 0.109728  |
| 6             | 7             | 0           | -0.489507               | 0.079612  | -0.584960 |
| 7             | 7             | 0           | 0.888592                | -2.535883 | -1.007157 |
| 8             | 6             | 0           | -0.412903               | -2.195702 | -1.300292 |
| 9             | 6             | 0           | -1.135232               | -1.223110 | -0.432577 |
| 10            | 7             | 0           | -0.794583               | -2.789179 | -2.391213 |
| 11            | 6             | 0           | 1.261659                | -3.395937 | -2.014895 |
| 12            | 7             | 0           | 0.260598                | -3.549640 | -2.839466 |
| 13            | 6             | 0           | 3.723252                | -1.991150 | 3.397115  |
| 14            | 6             | 0           | 2.592089                | -4.030966 | -2.151461 |
| 15            | 6             | 0           | 0.671960                | 0.261198  | -0.079341 |
| 16            | 6             | 0           | 2.669414                | 1.732897  | -0.445872 |
| 17            | 6             | 0           | 1.292701                | 1.596661  | -0.273373 |
| 18            | 6             | 0           | 0.490452                | 2.736407  | -0.342688 |
| 19            | 6             | 0           | 1.045076                | 3.983684  | -0.570272 |
| 20            | 6             | 0           | 2.418535                | 4.090414  | -0.743219 |
| 21            | 6             | 0           | 3.238147                | 2.974025  | -0.688132 |
| 22            | 17            | 0           | 3.124117                | 5.655615  | -1.032301 |
| 23            | 6             | 0           | 2.199748                | 0.624727  | 2.670596  |
| 24            | 6             | 0           | -2.603486               | -1.118508 | -0.797611 |
| 25            | 6             | 0           | -3.389542               | -0.341191 | 0.232783  |
| 26            | 8             | 0           | -3.022859               | -0.159122 | 1.370722  |
| 27            | 8             | 0           | -4.543937               | 0.072911  | -0.287401 |
| 28            | 6             | 0           | -5.555360               | 0.794004  | 0.504449  |
| 29            | 6             | 0           | -6.670127               | 1.020033  | -0.505186 |
| 30            | 6             | 0           | -4.988962               | 2.122526  | 0.984478  |
| 31            | 6             | 0           | -6.041052               | -0.080308 | 1.651543  |
| 32            | 1             | 0           | -1.046835               | -1.564776 | 0.607199  |
| 33            | 1             | 0           | 4.651618                | -1.419662 | 3.325058  |
| 34            | 1             | 0           | 3.987445                | -3.042627 | 3.504520  |
| 35            | 1             | 0           | 3.217559                | -1.682101 | 4.314390  |

|    |   |   |           |           |           |
|----|---|---|-----------|-----------|-----------|
| 36 | 1 | 0 | 2.764668  | -4.785239 | -1.381405 |
| 37 | 1 | 0 | 2.639151  | -4.517767 | -3.123203 |
| 38 | 1 | 0 | 3.394404  | -3.294233 | -2.084964 |
| 39 | 1 | 0 | 3.307807  | 0.859131  | -0.408646 |
| 40 | 1 | 0 | -0.578490 | 2.635035  | -0.212297 |
| 41 | 1 | 0 | 0.421743  | 4.866491  | -0.612112 |
| 42 | 1 | 0 | 4.305026  | 3.073208  | -0.834126 |
| 43 | 1 | 0 | 2.371520  | 0.387862  | 3.720545  |
| 44 | 1 | 0 | 1.250520  | 1.155011  | 2.597118  |
| 45 | 1 | 0 | 2.984427  | 1.317168  | 2.357406  |
| 46 | 1 | 0 | -2.725238 | -0.659202 | -1.777484 |
| 47 | 1 | 0 | -3.047999 | -2.115162 | -0.860835 |
| 48 | 1 | 0 | -6.311026 | 1.608513  | -1.350291 |
| 49 | 1 | 0 | -7.049260 | 0.068612  | -0.880198 |
| 50 | 1 | 0 | -7.492986 | 1.558420  | -0.033940 |
| 51 | 1 | 0 | -4.593007 | 2.693494  | 0.143065  |
| 52 | 1 | 0 | -4.198461 | 1.977822  | 1.717075  |
| 53 | 1 | 0 | -5.787758 | 2.707066  | 1.444063  |
| 54 | 1 | 0 | -5.258959 | -0.243951 | 2.389269  |
| 55 | 1 | 0 | -6.884189 | 0.409211  | 2.141807  |
| 56 | 1 | 0 | -6.383265 | -1.046081 | 1.275989  |

-----

Conformer # 2

Energy: -2119.276876 Hartree

| Center<br>Number | Atomic<br>Number | Atomic<br>Type | Coordinates (Angstroms) |           |           |
|------------------|------------------|----------------|-------------------------|-----------|-----------|
|                  |                  |                | X                       | Y         | Z         |
| 1                | 16               | 0              | 0.702398                | 3.568371  | -0.364371 |
| 2                | 6                | 0              | 1.858274                | 3.056011  | -1.543981 |
| 3                | 6                | 0              | 2.047894                | 1.702065  | -1.515782 |
| 4                | 6                | 0              | 1.253539                | 1.057236  | -0.507240 |
| 5                | 6                | 0              | 0.471459                | 1.954470  | 0.184463  |
| 6                | 7                | 0              | 0.202892                | -1.083557 | 0.032476  |
| 7                | 7                | 0              | -0.472191               | 1.610625  | 1.150095  |
| 8                | 6                | 0              | -1.266131               | 0.491214  | 1.059386  |
| 9                | 6                | 0              | -1.105902               | -0.445245 | -0.089395 |
| 10               | 7                | 0              | -2.042954               | 0.408335  | 2.096826  |
| 11               | 6                | 0              | -0.841785               | 2.207564  | 2.334490  |
| 12               | 7                | 0              | -1.778364               | 1.493886  | 2.899383  |
| 13               | 6                | 0              | 2.503574                | 4.067937  | -2.432097 |
| 14               | 6                | 0              | -0.258140               | 3.451143  | 2.886564  |

|    |    |   |           |           |           |
|----|----|---|-----------|-----------|-----------|
| 15 | 6  | 0 | 1.255133  | -0.386882 | -0.182657 |
| 16 | 6  | 0 | 3.678242  | -0.398465 | 0.462418  |
| 17 | 6  | 0 | 2.562862  | -1.075044 | -0.028978 |
| 18 | 6  | 0 | 2.676730  | -2.434891 | -0.321574 |
| 19 | 6  | 0 | 3.873965  | -3.104054 | -0.137704 |
| 20 | 6  | 0 | 4.967997  | -2.407017 | 0.357383  |
| 21 | 6  | 0 | 4.880795  | -1.058360 | 0.664823  |
| 22 | 17 | 0 | 6.477115  | -3.241999 | 0.594359  |
| 23 | 6  | 0 | 2.948110  | 0.991104  | -2.478882 |
| 24 | 6  | 0 | -2.190493 | -1.508353 | -0.114840 |
| 25 | 6  | 0 | -3.542115 | -0.967583 | -0.517297 |
| 26 | 8  | 0 | -3.708457 | 0.087672  | -1.084796 |
| 27 | 8  | 0 | -4.498830 | -1.833282 | -0.188621 |
| 28 | 6  | 0 | -5.920340 | -1.594325 | -0.493112 |
| 29 | 6  | 0 | -6.122883 | -1.503496 | -1.998657 |
| 30 | 6  | 0 | -6.405289 | -0.350210 | 0.237058  |
| 31 | 6  | 0 | -6.594240 | -2.838865 | 0.063920  |
| 32 | 1  | 0 | -1.159759 | 0.148084  | -1.011403 |
| 33 | 1  | 0 | 2.394790  | 3.787906  | -3.482121 |
| 34 | 1  | 0 | 2.058637  | 5.054387  | -2.306449 |
| 35 | 1  | 0 | 3.572503  | 4.155147  | -2.224048 |
| 36 | 1  | 0 | 0.831924  | 3.404768  | 2.908920  |
| 37 | 1  | 0 | -0.627062 | 3.579414  | 3.901888  |
| 38 | 1  | 0 | -0.545243 | 4.328952  | 2.304384  |
| 39 | 1  | 0 | 3.606845  | 0.653611  | 0.708229  |
| 40 | 1  | 0 | 1.812979  | -2.965806 | -0.698657 |
| 41 | 1  | 0 | 3.961774  | -4.155359 | -0.375937 |
| 42 | 1  | 0 | 5.739660  | -0.532172 | 1.058290  |
| 43 | 1  | 0 | 3.961704  | 0.881908  | -2.086266 |
| 44 | 1  | 0 | 3.018466  | 1.541009  | -3.417492 |
| 45 | 1  | 0 | 2.577930  | -0.008882 | -2.703503 |
| 46 | 1  | 0 | -2.268752 | -2.010102 | 0.848659  |
| 47 | 1  | 0 | -1.911247 | -2.271054 | -0.846211 |
| 48 | 1  | 0 | -7.191702 | -1.457998 | -2.214196 |
| 49 | 1  | 0 | -5.716476 | -2.388041 | -2.492040 |
| 50 | 1  | 0 | -5.647726 | -0.616875 | -2.411642 |
| 51 | 1  | 0 | -5.942981 | 0.551249  | -0.158081 |
| 52 | 1  | 0 | -7.487095 | -0.266466 | 0.120817  |
| 53 | 1  | 0 | -6.183597 | -0.423779 | 1.302837  |
| 54 | 1  | 0 | -7.670496 | -2.782859 | -0.102464 |
| 55 | 1  | 0 | -6.414479 | -2.927207 | 1.136005  |
| 56 | 1  | 0 | -6.214844 | -3.735652 | -0.427654 |

Conformer # 3

Energy: -2119.275182 Hartree

| Center<br>Number | Atomic<br>Number | Atomic<br>Type | Coordinates (Angstroms) |           |           |
|------------------|------------------|----------------|-------------------------|-----------|-----------|
|                  |                  |                | X                       | Y         | Z         |
| 1                | 16               | 0              | -0.499454               | 3.562299  | 1.440172  |
| 2                | 6                | 0              | -1.128289               | 2.385981  | 2.540454  |
| 3                | 6                | 0              | -1.144855               | 1.133599  | 1.991560  |
| 4                | 6                | 0              | -0.650754               | 1.118728  | 0.642376  |
| 5                | 6                | 0              | -0.260915               | 2.370430  | 0.222942  |
| 6                | 7                | 0              | 0.423973                | -0.336425 | -1.000655 |
| 7                | 7                | 0              | 0.341365                | 2.651598  | -1.001468 |
| 8                | 6                | 0              | 1.259355                | 1.819419  | -1.600951 |
| 9                | 6                | 0              | 1.608535                | 0.518277  | -0.961010 |
| 10               | 7                | 0              | 1.654674                | 2.329171  | -2.728502 |
| 11               | 6                | 0              | 0.218435                | 3.717297  | -1.864001 |
| 12               | 7                | 0              | 1.000788                | 3.528193  | -2.892475 |
| 13               | 6                | 0              | -1.572105               | 2.812700  | 3.900462  |
| 14               | 6                | 0              | -0.672566               | 4.882771  | -1.665018 |
| 15               | 6                | 0              | -0.576477               | -0.057843 | -0.252191 |
| 16               | 6                | 0              | -3.053707               | -0.443441 | -0.205210 |
| 17               | 6                | 0              | -1.762103               | -0.946855 | -0.352918 |
| 18               | 6                | 0              | -1.598682               | -2.297576 | -0.664282 |
| 19               | 6                | 0              | -2.693743               | -3.129952 | -0.814829 |
| 20               | 6                | 0              | -3.969227               | -2.601821 | -0.665644 |
| 21               | 6                | 0              | -4.161087               | -1.262055 | -0.366842 |
| 22               | 17               | 0              | -5.351933               | -3.641856 | -0.856867 |
| 23               | 6                | 0              | -1.587799               | -0.076916 | 2.754678  |
| 24               | 6                | 0              | 2.761681                | -0.163384 | -1.682970 |
| 25               | 6                | 0              | 3.207421                | -1.460525 | -1.046749 |
| 26               | 8                | 0              | 3.422237                | -2.468655 | -1.676889 |
| 27               | 8                | 0              | 3.367742                | -1.320963 | 0.270646  |
| 28               | 6                | 0              | 3.858731                | -2.413449 | 1.127936  |
| 29               | 6                | 0              | 2.890048                | -3.586558 | 1.088477  |
| 30               | 6                | 0              | 3.871998                | -1.776660 | 2.509125  |
| 31               | 6                | 0              | 5.267094                | -2.809104 | 0.707874  |
| 32               | 1                | 0              | 1.893303                | 0.722486  | 0.079162  |
| 33               | 1                | 0              | -1.116407               | 2.187413  | 4.671093  |
| 34               | 1                | 0              | -2.656179               | 2.729885  | 4.008774  |
| 35               | 1                | 0              | -1.295301               | 3.845871  | 4.107369  |
| 36               | 1                | 0              | -0.686204               | 5.462359  | -2.585569 |

|    |   |   |           |           |           |
|----|---|---|-----------|-----------|-----------|
| 37 | 1 | 0 | -1.690838 | 4.570260  | -1.427715 |
| 38 | 1 | 0 | -0.323071 | 5.529802  | -0.858104 |
| 39 | 1 | 0 | -3.203138 | 0.604976  | 0.020246  |
| 40 | 1 | 0 | -0.598906 | -2.691140 | -0.789199 |
| 41 | 1 | 0 | -2.563060 | -4.178354 | -1.046153 |
| 42 | 1 | 0 | -5.161353 | -0.864050 | -0.264195 |
| 43 | 1 | 0 | -1.397005 | 0.048819  | 3.820698  |
| 44 | 1 | 0 | -2.657101 | -0.265549 | 2.633532  |
| 45 | 1 | 0 | -1.061436 | -0.971181 | 2.422768  |
| 46 | 1 | 0 | 2.486747  | -0.378126 | -2.713024 |
| 47 | 1 | 0 | 3.623145  | 0.509015  | -1.700068 |
| 48 | 1 | 0 | 1.881648  | -3.257694 | 1.343967  |
| 49 | 1 | 0 | 2.872230  | -4.055861 | 0.107796  |
| 50 | 1 | 0 | 3.200053  | -4.329882 | 1.824861  |
| 51 | 1 | 0 | 2.870265  | -1.453260 | 2.794717  |
| 52 | 1 | 0 | 4.536019  | -0.911532 | 2.529531  |
| 53 | 1 | 0 | 4.224088  | -2.499433 | 3.245872  |
| 54 | 1 | 0 | 5.921362  | -1.935793 | 0.695126  |
| 55 | 1 | 0 | 5.668526  | -3.521347 | 1.430638  |
| 56 | 1 | 0 | 5.275361  | -3.272103 | -0.276110 |

-----

Conformer # 4

Energy: -2119.274800 Hartree

| Center<br>Number | Atomic<br>Number | Atomic<br>Type | Coordinates (Angstroms) |           |           |
|------------------|------------------|----------------|-------------------------|-----------|-----------|
|                  |                  |                | X                       | Y         | Z         |
| 1                | 16               | 0              | -0.246443               | 3.276521  | -0.032216 |
| 2                | 6                | 0              | 0.916280                | 3.126165  | -1.303234 |
| 3                | 6                | 0              | 1.423327                | 1.858692  | -1.381534 |
| 4                | 6                | 0              | 0.874552                | 0.984673  | -0.382152 |
| 5                | 6                | 0              | -0.050247               | 1.625679  | 0.410960  |
| 6                | 7                | 0              | 0.405733                | -1.371820 | 0.068507  |
| 7                | 7                | 0              | -0.818379               | 1.010763  | 1.397225  |
| 8                | 6                | 0              | -1.329993               | -0.260027 | 1.269028  |
| 9                | 6                | 0              | -1.024262               | -1.067147 | 0.053845  |
| 10               | 7                | 0              | -2.002096               | -0.580760 | 2.332916  |
| 11               | 6                | 0              | -1.246348               | 1.438014  | 2.634172  |
| 12               | 7                | 0              | -1.953173               | 0.492311  | 3.192576  |
| 13               | 6                | 0              | 1.242308                | 4.312123  | -2.149685 |
| 14               | 6                | 0              | -0.937468               | 2.752337  | 3.241667  |
| 15               | 6                | 0              | 1.244062                | -0.430742 | -0.156030 |

|    |    |   |           |           |           |
|----|----|---|-----------|-----------|-----------|
| 16 | 6  | 0 | 3.637812  | 0.121567  | 0.347444  |
| 17 | 6  | 0 | 2.685965  | -0.786246 | -0.114683 |
| 18 | 6  | 0 | 3.102256  | -2.066189 | -0.484064 |
| 19 | 6  | 0 | 4.434295  | -2.432196 | -0.402608 |
| 20 | 6  | 0 | 5.360620  | -1.509946 | 0.065804  |
| 21 | 6  | 0 | 4.974052  | -0.234631 | 0.446994  |
| 22 | 17 | 0 | 7.037838  | -1.962928 | 0.173784  |
| 23 | 6  | 0 | 2.400552  | 1.443606  | -2.438025 |
| 24 | 6  | 0 | -1.808002 | -2.370984 | 0.013450  |
| 25 | 6  | 0 | -3.309029 | -2.267005 | -0.135541 |
| 26 | 8  | 0 | -4.059185 | -3.137492 | 0.237001  |
| 27 | 8  | 0 | -3.671022 | -1.146073 | -0.760866 |
| 28 | 6  | 0 | -5.078360 | -0.831049 | -1.063484 |
| 29 | 6  | 0 | -5.648202 | -1.871787 | -2.016343 |
| 30 | 6  | 0 | -4.979817 | 0.524290  | -1.746809 |
| 31 | 6  | 0 | -5.878805 | -0.721382 | 0.226207  |
| 32 | 1  | 0 | -1.271873 | -0.456908 | -0.823414 |
| 33 | 1  | 0 | 2.276100  | 4.632931  | -2.002256 |
| 34 | 1  | 0 | 0.595594  | 5.158527  | -1.921384 |
| 35 | 1  | 0 | 1.118759  | 4.078332  | -3.209433 |
| 36 | 1  | 0 | -1.455269 | 3.568279  | 2.733767  |
| 37 | 1  | 0 | 0.132723  | 2.963664  | 3.211771  |
| 38 | 1  | 0 | -1.264669 | 2.733339  | 4.278983  |
| 39 | 1  | 0 | 3.334158  | 1.115209  | 0.651995  |
| 40 | 1  | 0 | 2.367390  | -2.776025 | -0.839338 |
| 41 | 1  | 0 | 4.754638  | -3.421610 | -0.699589 |
| 42 | 1  | 0 | 5.706461  | 0.468972  | 0.818373  |
| 43 | 1  | 0 | 2.272447  | 0.395817  | -2.708080 |
| 44 | 1  | 0 | 2.268446  | 2.041271  | -3.340136 |
| 45 | 1  | 0 | 3.434743  | 1.570320  | -2.109630 |
| 46 | 1  | 0 | -1.446854 | -2.953354 | -0.838723 |
| 47 | 1  | 0 | -1.609590 | -2.961901 | 0.905947  |
| 48 | 1  | 0 | -5.022254 | -1.957998 | -2.906172 |
| 49 | 1  | 0 | -5.724809 | -2.846631 | -1.540682 |
| 50 | 1  | 0 | -6.644596 | -1.559068 | -2.332898 |
| 51 | 1  | 0 | -4.535332 | 1.262056  | -1.077709 |
| 52 | 1  | 0 | -5.975728 | 0.868919  | -2.027138 |
| 53 | 1  | 0 | -4.370466 | 0.459448  | -2.649215 |
| 54 | 1  | 0 | -5.401523 | -0.021029 | 0.913135  |
| 55 | 1  | 0 | -6.875917 | -0.343303 | -0.005344 |
| 56 | 1  | 0 | -5.978975 | -1.685643 | 0.718370  |

---

Conformer # 5

Energy: -2119.270848 Hartree

| Center<br>Number | Atomic<br>Number | Atomic<br>Type | Coordinates (Angstroms) |           |           |
|------------------|------------------|----------------|-------------------------|-----------|-----------|
|                  |                  |                | X                       | Y         | Z         |
| 1                | 16               | 0              | -1.914903               | -3.678151 | -0.071035 |
| 2                | 6                | 0              | -3.136843               | -2.871510 | -0.990989 |
| 3                | 6                | 0              | -2.851994               | -1.545308 | -1.161783 |
| 4                | 6                | 0              | -1.623954               | -1.159616 | -0.522357 |
| 5                | 6                | 0              | -1.009991               | -2.223625 | 0.096642  |
| 6                | 7                | 0              | 0.181014                | 0.484894  | -0.674600 |
| 7                | 7                | 0              | 0.244535                | -2.183657 | 0.702010  |
| 8                | 6                | 0              | 1.302444                | -1.455562 | 0.205661  |
| 9                | 6                | 0              | 1.118187                | -0.585652 | -0.992824 |
| 10               | 7                | 0              | 2.359282                | -1.654549 | 0.933130  |
| 11               | 6                | 0              | 0.755011                | -2.840532 | 1.798782  |
| 12               | 7                | 0              | 2.015175                | -2.527200 | 1.937922  |
| 13               | 6                | 0              | -4.316007               | -3.640916 | -1.487727 |
| 14               | 6                | 0              | -0.006874               | -3.741306 | 2.693695  |
| 15               | 6                | 0              | -1.051921               | 0.205116  | -0.482885 |
| 16               | 6                | 0              | -1.689366               | 2.615127  | -0.634812 |
| 17               | 6                | 0              | -1.952071               | 1.337064  | -0.139750 |
| 18               | 6                | 0              | -3.029250               | 1.161582  | 0.727384  |
| 19               | 6                | 0              | -3.828200               | 2.232584  | 1.098409  |
| 20               | 6                | 0              | -3.551019               | 3.488679  | 0.582754  |
| 21               | 6                | 0              | -2.486178               | 3.691048  | -0.285081 |
| 22               | 17               | 0              | -4.556177               | 4.838011  | 1.030858  |
| 23               | 6                | 0              | -3.715386               | -0.634043 | -1.979253 |
| 24               | 6                | 0              | 2.437168                | -0.050373 | -1.538261 |
| 25               | 6                | 0              | 3.296740                | 0.772577  | -0.597247 |
| 26               | 8                | 0              | 2.887290                | 1.525455  | 0.250470  |
| 27               | 8                | 0              | 4.584849                | 0.579488  | -0.904147 |
| 28               | 6                | 0              | 5.670048                | 1.300841  | -0.223013 |
| 29               | 6                | 0              | 5.539887                | 2.797279  | -0.471582 |
| 30               | 6                | 0              | 6.915356                | 0.753516  | -0.904630 |
| 31               | 6                | 0              | 5.679164                | 0.956373  | 1.259535  |
| 32               | 1                | 0              | 0.685395                | -1.222652 | -1.779360 |
| 33               | 1                | 0              | -4.426093               | -3.528042 | -2.568617 |
| 34               | 1                | 0              | -5.241720               | -3.291704 | -1.024719 |
| 35               | 1                | 0              | -4.218878               | -4.705116 | -1.276091 |
| 36               | 1                | 0              | -0.936853               | -3.278675 | 3.028040  |
| 37               | 1                | 0              | -0.257026               | -4.685907 | 2.207054  |

|    |   |   |           |           |           |
|----|---|---|-----------|-----------|-----------|
| 38 | 1 | 0 | 0.611199  | -3.958997 | 3.562129  |
| 39 | 1 | 0 | -0.848033 | 2.757723  | -1.299598 |
| 40 | 1 | 0 | -3.240605 | 0.181183  | 1.135468  |
| 41 | 1 | 0 | -4.655021 | 2.093902  | 1.781478  |
| 42 | 1 | 0 | -2.285937 | 4.678134  | -0.679117 |
| 43 | 1 | 0 | -4.476215 | -0.138783 | -1.371581 |
| 44 | 1 | 0 | -4.232666 | -1.192435 | -2.759745 |
| 45 | 1 | 0 | -3.125595 | 0.146097  | -2.459520 |
| 46 | 1 | 0 | 3.032378  | -0.879140 | -1.918108 |
| 47 | 1 | 0 | 2.208538  | 0.593302  | -2.392160 |
| 48 | 1 | 0 | 6.423999  | 3.303742  | -0.080566 |
| 49 | 1 | 0 | 5.479334  | 3.001981  | -1.541970 |
| 50 | 1 | 0 | 4.659785  | 3.207697  | 0.017879  |
| 51 | 1 | 0 | 6.891101  | 0.958191  | -1.975829 |
| 52 | 1 | 0 | 6.991543  | -0.324696 | -0.758099 |
| 53 | 1 | 0 | 7.804946  | 1.223069  | -0.483286 |
| 54 | 1 | 0 | 5.706700  | -0.125323 | 1.397887  |
| 55 | 1 | 0 | 4.803342  | 1.353686  | 1.766588  |
| 56 | 1 | 0 | 6.572977  | 1.380989  | 1.719979  |

-----

Conformer # 6

Energy: -2119.270031 Hartree

| Center<br>Number | Atomic<br>Number | Atomic<br>Type | Coordinates (Angstroms) |           |           |
|------------------|------------------|----------------|-------------------------|-----------|-----------|
|                  |                  |                | X                       | Y         | Z         |
| 1                | 16               | 0              | -0.041559               | 3.196122  | 1.783259  |
| 2                | 6                | 0              | 0.468883                | 1.866228  | 2.761912  |
| 3                | 6                | 0              | 0.737848                | 0.756342  | 2.009443  |
| 4                | 6                | 0              | 0.544363                | 0.984681  | 0.603028  |
| 5                | 6                | 0              | 0.114227                | 2.264258  | 0.345254  |
| 6                | 7                | 0              | 0.001943                | -0.214579 | -1.478013 |
| 7                | 7                | 0              | -0.274853               | 2.744542  | -0.903860 |
| 8                | 6                | 0              | -0.926107               | 1.987938  | -1.850652 |
| 9                | 6                | 0              | -1.236557               | 0.538944  | -1.674732 |
| 10               | 7                | 0              | -1.150821               | 2.705221  | -2.912419 |
| 11               | 6                | 0              | -0.131008               | 3.985909  | -1.482748 |
| 12               | 7                | 0              | -0.656220               | 3.964891  | -2.678010 |
| 13               | 6                | 0              | 0.571958                | 2.034929  | 4.241740  |
| 14               | 6                | 0              | 0.531716                | 5.154541  | -0.860024 |
| 15               | 6                | 0              | 0.765353                | -0.009498 | -0.472919 |
| 16               | 6                | 0              | 3.202423                | -0.272968 | 0.067492  |



|    |    |   |           |           |           |
|----|----|---|-----------|-----------|-----------|
| 17 | 6  | 0 | 2.016803  | -0.813668 | -0.426984 |
| 18 | 6  | 0 | 2.034488  | -2.106534 | -0.951470 |
| 19 | 6  | 0 | 3.202246  | -2.848809 | -0.974742 |
| 20 | 6  | 0 | 4.370715  | -2.284176 | -0.480988 |
| 21 | 6  | 0 | 4.384046  | -0.998395 | 0.036138  |
| 22 | 17 | 0 | 5.845834  | -3.208790 | -0.511416 |
| 23 | 6  | 0 | 1.133802  | -0.551940 | 2.622447  |
| 24 | 6  | 0 | -2.323699 | 0.255412  | -0.632013 |
| 25 | 6  | 0 | -2.900572 | -1.138638 | -0.772577 |
| 26 | 8  | 0 | -2.861011 | -1.792276 | -1.787107 |
| 27 | 8  | 0 | -3.485151 | -1.503043 | 0.368116  |
| 28 | 6  | 0 | -4.222726 | -2.772374 | 0.506062  |
| 29 | 6  | 0 | -4.714201 | -2.717522 | 1.944294  |
| 30 | 6  | 0 | -3.277589 | -3.948309 | 0.306688  |
| 31 | 6  | 0 | -5.397832 | -2.798864 | -0.460582 |
| 32 | 1  | 0 | -1.638524 | 0.217258  | -2.635353 |
| 33 | 1  | 0 | 1.610319  | 1.977203  | 4.576349  |
| 34 | 1  | 0 | 0.170498  | 2.994621  | 4.565125  |
| 35 | 1  | 0 | 0.015336  | 1.252080  | 4.761423  |
| 36 | 1  | 0 | 0.648951  | 5.922737  | -1.621419 |
| 37 | 1  | 0 | 1.515253  | 4.894088  | -0.465730 |
| 38 | 1  | 0 | -0.059149 | 5.571424  | -0.042193 |
| 39 | 1  | 0 | 3.213242  | 0.734033  | 0.465504  |
| 40 | 1  | 0 | 1.117743  | -2.525685 | -1.344064 |
| 41 | 1  | 0 | 3.209861  | -3.854911 | -1.371556 |
| 42 | 1  | 0 | 5.304755  | -0.569640 | 0.407513  |
| 43 | 1  | 0 | 0.769412  | -1.393840 | 2.034894  |
| 44 | 1  | 0 | 2.218507  | -0.655220 | 2.699232  |
| 45 | 1  | 0 | 0.724493  | -0.643265 | 3.628673  |
| 46 | 1  | 0 | -3.154967 | 0.949136  | -0.790990 |
| 47 | 1  | 0 | -1.982686 | 0.405332  | 0.389883  |
| 48 | 1  | 0 | -3.874214 | -2.656862 | 2.637456  |
| 49 | 1  | 0 | -5.286703 | -3.616877 | 2.173379  |
| 50 | 1  | 0 | -5.356884 | -1.850038 | 2.099447  |
| 51 | 1  | 0 | -2.415350 | -3.860657 | 0.969649  |
| 52 | 1  | 0 | -2.929110 | -4.011767 | -0.721369 |
| 53 | 1  | 0 | -3.801277 | -4.873135 | 0.554049  |
| 54 | 1  | 0 | -6.024201 | -1.915899 | -0.323550 |
| 55 | 1  | 0 | -6.007197 | -3.680510 | -0.255760 |
| 56 | 1  | 0 | -5.064864 | -2.841008 | -1.495005 |

-----  
CompareVOA results (cc-pVTZ / B3PW91):

Optimal Scaling Factor = 0.980

$S_{fg}$  (IR) = 83.9

$S_{fg}$  (VCD S-config) = 85.6

$S_{fg}$  (VCD R-config) = 2.5

ESI (Enantiomeric Similarity Index) = 83.1

Confidence Level = 100

## References

- 1 G. M. Sheldrick, *Acta Crystallogr. Sect. C Struct. Chem.*, 2015, **71**, 3.
- 2 A. L. Spek, *J. Appl. Crystallogr.*, 2003, **36**, 7.
- 3 O. V. Dolomanov, L. J. Bourhis, R. J. Gildea, J. A. K. Howard and H. Puschmann, *J. Appl. Crystallogr.*, 2009, **42**, 339.
- 4 L. J. Farrugia, *J. Appl. Crystallogr.*, 2012, **45**, 849.
- 5 C. F. Macrae, P. R. Edgington, P. McCabe, E. Pidcock, G. P. Shields, R. Taylor, M. Towler and J. Van De Streek, *J. Appl. Crystallogr.*, 2006, **39**, 453.
- 6 He, Y.; Wang, B.; Dukor, R. K.; Nafie, L. A. *Applied Spectroscopy* **2011**, *65*, 699.
- 7 Bogaerts, J.; Aerts, R.; Vermeyen, T.; Johannessen, C.; Herrebout, W.; Batista, J.M. *Pharmaceuticals* **2021**, *14*(9), 877.
- 8 O'Connor, T.J.; Mai, B.K.; Nafie, J.; Liu, P.; Toste, F.D. *J. Am. Chem. Soc.* **2021**, *143*, 13759.
- 9 Stephens, P. J.; Devlin, F. J.; Cheeseman, J. R.; Frisch, M. J. *J. Phys. Chem. A* **1997**, *101*, 6322.
- 10 Polavarapu, P. L.; Covington, C. L. *Chirality* **2014**, *26*, 539-552.
11. Debie, E.; DeGuessem E.; Dukor, R. K.; Herrebout, W.; Nafie, L. A.; Bultinck, P. *ChemPhysChem* **2011**, *12*, 1542.
